# Supplementary material
Source: PubMed Central journal article supplement (PMC3330730)
Supplement: supp_00369.2011_tableS1-6.pdf [file supp_00369.2011_tableS1-6.pdf]

## Supplemental Data

Table S1. Differentially expressed genes between high WSS and static control treated cells\*

| Symbol    | Description                                                               | Gene ID | Ratio | Adjusted <i>p</i> value |
|-----------|---------------------------------------------------------------------------|---------|-------|-------------------------|
| IL1F6     | interleukin 1 family, member 6 (epsilon)                                  | 523429  | 5.23  | 0.0000018               |
| AQP1      | aquaporin 1 (Colton blood group)                                          | 282653  | 4.30  | 0.0000025               |
| AFF1      | AF4/FMR2 family, member 1                                                 | 781149  | 4.24  | 0.0000004               |
| SULT1B1   | sulfotransferase family, cytosolic, 1B, member 1                          | 521920  | 4.19  | 0.0000038               |
| NQO1      | NAD(P)H dehydrogenase, quinone 1                                          | 519632  | 3.96  | 0.0000001               |
| PI3       | peptidase inhibitor 3, skin-derived (SKALP)                               | 407165  | 3.89  | 0.0000060               |
| ANO1      | anoctamin 1, calcium activated chloride channel                           | 532126  | 3.88  | 0.0000034               |
| SRXN1     | sulfiredoxin 1 homolog ( <i>S. cerevisiae</i> )                           | 531606  | 3.79  | 0.0000002               |
| SELP      | selectin P                                                                | 281486  | 3.68  | 0.0000014               |
| CXCL12    | chemokine (C-X-C motif) ligand 12 (stromal cell-derived factor 1)         | 613811  | 3.67  | 0.0000051               |
| SLC39A8   | solute carrier family 39 (zinc transporter), member 8                     | 508193  | 3.40  | 0.0000018               |
| ADAMTS1   | ADAM metallopeptidase with thrombospondin type 1 motif, 1                 | 512171  | 3.40  | 0.0000048               |
| NPPC      | natriuretic peptide precursor C                                           | 281356  | 3.39  | 0.0000008               |
| PTPRR     | protein tyrosine phosphatase, receptor type, R                            | 536337  | 3.19  | 0.0000003               |
| ISG20     | interferon stimulated exonuclease gene 20kDa                              | 506604  | 3.18  | 0.0000020               |
| HES1      | hairy and enhancer of split 1, ( <i>Drosophila</i> )                      | 539547  | 3.14  | 0.0000027               |
| AIF1L     | allograft inflammatory factor 1-like                                      | 617493  | 2.99  | 0.0000004               |
| MALL      | mal, T-cell differentiation protein-like                                  | 512289  | 2.95  | 0.0000004               |
| PLEK2     | pleckstrin 2                                                              | 784941  | 2.87  | 0.0000001               |
| SELE      | selectin E                                                                | 281484  | 2.87  | 0.0000324               |
| LOC520939 | similar to Krueppel-like factor 2 (Lung krueppel-like factor)             | 520939  | 2.78  | 0.0000005               |
| CCDC80    | coiled-coil domain containing 80                                          | 515235  | 2.75  | 0.0000004               |
| MTMR11    | myotubularin related protein 11                                           | 506122  | 2.72  | 0.0000005               |
| ENPP1     | ectonucleotide pyrophosphatase/phosphodiesterase 1                        | 615535  | 2.72  | 0.0000017               |
| SKIL      | SKI-like oncogene                                                         | 527910  | 2.71  | 0.0000010               |
| SLC9A3R2  | solute carrier family 9 (sodium/hydrogen exchanger), member 3 regulator 2 | 768005  | 2.70  | 0.0000008               |

|           |                                                                                                 |        |      |           |
|-----------|-------------------------------------------------------------------------------------------------|--------|------|-----------|
| NCEH1     | neutral cholesterol ester hydrolase 1                                                           | 534212 | 2.68 | 0.0000027 |
| DECR1     | 2,4-dienoyl CoA reductase 1, mitochondrial                                                      | 509952 | 2.66 | 0.0000399 |
| CAMK1D    | calcium/calmodulin-dependent protein kinase ID                                                  | 526873 | 2.65 | 0.0000048 |
| PODXL     | podocalyxin-like                                                                                | 616366 | 2.49 | 0.0000048 |
| EXOC3L2   | exocyst complex component 3-like 2                                                              | 539328 | 2.48 | 0.0000123 |
| EID3      | EP300 interacting inhibitor of differentiation 3                                                | 507232 | 2.47 | 0.0000062 |
| PLAT      | plasminogen activator, tissue                                                                   | 281407 | 2.41 | 0.0000004 |
| TXNRD1    | thioredoxin reductase 1                                                                         | 282388 | 2.41 | 0.0000017 |
| PMP22     | peripheral myelin protein 22                                                                    | 534497 | 2.37 | 0.0000015 |
| NOS3      | nitric oxide synthase 3 (endothelial cell)                                                      | 287024 | 2.35 | 0.0000196 |
| AKAP12    | A kinase (PRKA) anchor protein 12                                                               | 513774 | 2.35 | 0.0000099 |
| CSRP2     | cysteine and glycine-rich protein 2                                                             | 539381 | 2.34 | 0.0000006 |
| MLLT11    | myeloid/lymphoid or mixed-lineage leukemia (trithorax homolog, Drosophila); translocated to, 11 | 539519 | 2.31 | 0.0001108 |
| SERPINE1  | serpin peptidase inhibitor, clade E (nexin, plasminogen activator inhibitor type 1), member 1   | 281375 | 2.26 | 0.0000082 |
| NCAPG     | non-SMC condensin I complex, subunit G                                                          | 531234 | 2.24 | 0.0000012 |
| MGC165862 | hypothetical LOC614805                                                                          | 614805 | 2.23 | 0.0000037 |
| CYB561    | cytochrome b-561                                                                                | 317663 | 2.22 | 0.0000202 |
| STBD1     | starch binding domain 1                                                                         | 513376 | 2.18 | 0.0000061 |
| LOC537017 | similar to cytidine monophosphate-N-acetylneuraminic acid hydroxylase                           | 537017 | 2.16 | 0.0000137 |
| ARF4      | ADP-ribosylation factor 4                                                                       | 282601 | 2.15 | 0.0000004 |
| GFPT2     | glutamine-fructose-6-phosphate transaminase 2                                                   | 530101 | 2.13 | 0.0000072 |
| MYADM     | myeloid-associated differentiation marker                                                       | 506295 | 2.12 | 0.0000014 |
| DCK       | deoxycytidine kinase                                                                            | 530642 | 2.05 | 0.0000040 |
| ABHD5     | abhydrolase domain containing 5                                                                 | 535588 | 2.05 | 0.0000011 |
| ID1       | inhibitor of DNA binding 1, dominant negative helix-loop-helix protein                          | 497011 | 2.03 | 0.0000041 |
| PLK3      | polo-like kinase 3 (Drosophila)                                                                 | 504282 | 2.03 | 0.0000008 |
| FAM134B   | family with sequence similarity 134, member B                                                   | 540068 | 2.03 | 0.0000027 |
| SERPINB2  | serpin peptidase inhibitor, clade B (ovalbumin), member 2                                       | 281376 | 2.02 | 0.0031435 |
| PMEPA1    | prostate transmembrane protein, androgen induced 1                                              | 617469 | 1.99 | 0.0000085 |
| TMC6      | transmembrane channel-like 6                                                                    | 505575 | 1.98 | 0.0000085 |

|           |                                                            |        |      |           |
|-----------|------------------------------------------------------------|--------|------|-----------|
| FHL2      | four and a half LIM domains 2                              | 510008 | 1.95 | 0.0000091 |
| GCLM      | glutamate-cysteine ligase, modifier subunit                | 525659 | 1.93 | 0.0000016 |
| PLVAP     | plasmalemma vesicle associated protein                     | 524990 | 1.91 | 0.0000991 |
| MYOZ2     | myozenin 2                                                 | 540487 | 1.88 | 0.0000014 |
| GPR116    | G protein-coupled receptor 116                             | 532674 | 1.84 | 0.0000048 |
| ENG       | endoglin                                                   | 615844 | 1.81 | 0.0000166 |
| SPAG9     | sperm associated antigen 9                                 | 540689 | 1.77 | 0.0000061 |
| CRYAB     | crystallin, alpha B                                        | 281719 | 1.77 | 0.0000460 |
| ADAMTS6   | ADAM metalloproteinase with thrombospondin type 1 motif, 6 | 540722 | 1.77 | 0.0000070 |
| PTPRB     | protein tyrosine phosphatase, receptor type, B             | 505696 | 1.77 | 0.0000041 |
| ALAS1     | aminolevulinate, delta-, synthase 1                        | 534286 | 1.76 | 0.0000030 |
| LOC529423 | similar to family with sequence similarity 40, member B    | 529423 | 1.73 | 0.0002436 |
| LAP3      | leucine aminopeptidase 3                                   | 781648 | 1.72 | 0.0000032 |
| SQRDL     | sulfide quinone reductase-like (yeast)                     | 507858 | 1.72 | 0.0000038 |
| MFAP5     | microfibrillar associated protein 5                        | 281908 | 1.72 | 0.0000048 |
| ENDOD1    | endonuclease domain containing 1                           | 538618 | 1.71 | 0.0000085 |
| GATA2     | GATA binding protein 2                                     | 506809 | 1.70 | 0.0000039 |
| RBP4      | retinol binding protein 4, plasma                          | 281444 | 1.69 | 0.0000166 |
| LOC781772 | similar to RIKEN cDNA 2200001I15                           | 781772 | 1.69 | 0.0000300 |
| BLVRB     | biliverdin reductase B (flavin reductase (NADPH))          | 281650 | 1.69 | 0.0000021 |
| ANLN      | anillin, actin binding protein                             | 518274 | 1.69 | 0.0000541 |
| TBC1D1    | TBC1 (tre-2/USP6, BUB2, cdc16) domain family, member 1     | 282704 | 1.67 | 0.0000354 |
| NR4A2     | nuclear receptor subfamily 4, group A, member 2            | 540245 | 1.66 | 0.0000650 |
| LOC511659 | similar to phospholipase C, gamma 2                        | 511659 | 1.66 | 0.0000540 |
| CBR1      | carbonyl reductase 1                                       | 515946 | 1.65 | 0.0000160 |
| OIP5      | Opa interacting protein 5                                  | 511100 | 1.65 | 0.0000166 |
| LYVE1     | lymphatic vessel endothelial hyaluronan receptor 1         | 404179 | 1.64 | 0.0002816 |
| ABHD2     | abhydrolase domain containing 2                            | 508717 | 1.63 | 0.0000063 |
| LOC615685 | UPF0452 protein C7orf41 homolog                            | 615685 | 1.63 | 0.0000093 |
| SLC41A2   | solute carrier family 41, member 2                         | 524417 | 1.62 | 0.0000043 |
| HMCN1     | hemicentin 1                                               | 521326 | 1.62 | 0.0009112 |
| CLIC2     | chloride intracellular channel 2                           | 532777 | 1.62 | 0.0000034 |
| ENC1      | ectodermal-neural cortex (with BTB-like domain)            | 617091 | 1.61 | 0.0000068 |

|              |                                                                                                            |           |      |           |
|--------------|------------------------------------------------------------------------------------------------------------|-----------|------|-----------|
| HEY1         | hairy/enhancer-of-split related with YRPW motif 1                                                          | 408005    | 1.61 | 0.0001367 |
| MELK         | maternal embryonic leucine zipper kinase                                                                   | 520088    | 1.61 | 0.0000093 |
| PDLIM2       | PDZ and LIM domain 2 (mystique)                                                                            | 512907    | 1.59 | 0.0000046 |
| NUP160       | nucleoporin 160kDa                                                                                         | 540111    | 1.59 | 0.0000065 |
| PAFAH2       | platelet-activating factor acetylhydrolase 2, 40kDa                                                        | 282299    | 1.58 | 0.0000039 |
| LBH          | limb bud and heart development homolog (mouse)                                                             | 616148    | 1.58 | 0.0000333 |
| NCAPG2       | non-SMC condensin II complex, subunit G2                                                                   | 516644    | 1.58 | 0.0000059 |
| FOXM1        | forkhead box M1                                                                                            | 513643    | 1.56 | 0.0000069 |
| LOC787330    | similar to Intersectin-2 (SH3 domain-containing protein 1B) (SH3P18) (SH3P18-like WASP-associated protein) | 787330    | 1.55 | 0.0000054 |
| PTGIS        | prostaglandin I2 (prostaglyclin) synthase                                                                  | 282021    | 1.53 | 0.0000040 |
| ITGA5        | integrin, alpha 5 (fibronectin receptor, alpha polypeptide)                                                | 281873    | 1.53 | 0.0000165 |
| ZDHHC23      | zinc finger, DHHC-type containing 23                                                                       | 512177    | 1.53 | 0.0000750 |
| SIRPA        | signal-regulatory protein alpha                                                                            | 327666    | 1.52 | 0.0000051 |
| RRM2         | ribonucleotide reductase M2 polypeptide                                                                    | 508167    | 1.52 | 0.0000103 |
| ECT2         | epithelial cell transforming sequence 2 oncogene                                                           | 504746    | 1.51 | 0.0000052 |
| ANXA8        | annexin A8                                                                                                 | 281627    | 1.51 | 0.0049042 |
| KLF4         | Kruppel-like factor 4 (gut)                                                                                | 520842    | 1.50 | 0.0001074 |
| FGF2         | fibroblast growth factor 2 (basic)                                                                         | 281161    | 1.50 | 0.0000172 |
| TALDO1       | transaldolase 1                                                                                            | 513453    | 1.49 | 0.0000106 |
| TRIB1        | tribbles homolog 1 (Drosophila)                                                                            | 521857    | 1.48 | 0.0000263 |
| LOC100270684 | hypothetical protein LOC100270684                                                                          | 100270684 | 1.47 | 0.0001030 |
| H4           | histone H4                                                                                                 | 280691    | 1.47 | 0.0000521 |
| CDC2         | cell division cycle 2, G1 to S and G2 to M                                                                 | 281061    | 1.46 | 0.0000061 |
| DOK4         | docking protein 4                                                                                          | 618756    | 1.46 | 0.0000389 |
| HYAL1        | hyaluronoglucosaminidase 1                                                                                 | 515397    | 1.46 | 0.0000072 |
| TPX2         | TPX2, microtubule-associated, homolog (Xenopus laevis)                                                     | 507226    | 1.46 | 0.0000034 |
| FXYD5        | FXYD domain containing ion transport regulator 5                                                           | 505584    | 1.45 | 0.0000085 |
| ABHD3        | abhydrolase domain containing 3                                                                            | 539795    | 1.45 | 0.0002699 |
| ERCC6L       | excision repair cross-complementing rodent repair deficiency, complementation group 6-like                 | 782916    | 1.45 | 0.0000462 |
| RPS6KA1      | ribosomal protein S6 kinase, 90kDa, polypeptide 1                                                          | 533908    | 1.44 | 0.0000219 |
| CSGALNACT2   | chondroitin sulfate N-acetylgalactosaminyltransferase 2                                                    | 509328    | 1.44 | 0.0000048 |

|           |                                                                                 |        |      |           |
|-----------|---------------------------------------------------------------------------------|--------|------|-----------|
| ELOVL4    | elongation of very long chain fatty acids (FEN1/Elo2, SUR4/Elo3, yeast)-like 4  | 532015 | 1.44 | 0.0000521 |
| LOC506746 | similar to thyroid hormone receptor interactor 13                               | 506746 | 1.44 | 0.0000089 |
| IL1R1     | interleukin 1 receptor, type I                                                  | 515640 | 1.44 | 0.0000407 |
| CD46      | CD46 molecule, complement regulatory protein                                    | 280851 | 1.43 | 0.0000211 |
| BUB1      | budding uninhibited by benzimidazoles 1 homolog (yeast)                         | 514777 | 1.43 | 0.0000159 |
| ESPL1     | extra spindle pole bodies homolog 1 ( <i>S. cerevisiae</i> )                    | 506740 | 1.43 | 0.0000204 |
| TEK       | TEK tyrosine kinase, endothelial                                                | 280939 | 1.42 | 0.0000040 |
| TACC1     | transforming, acidic coiled-coil containing protein 1                           | 507012 | 1.42 | 0.0000041 |
| CD200     | CD200 molecule                                                                  | 534910 | 1.42 | 0.0000790 |
| RAD51AP1  | RAD51 associated protein 1                                                      | 615937 | 1.42 | 0.0000065 |
| PLIN2     | perilipin 2                                                                     | 280981 | 1.39 | 0.0000204 |
| CDCA8     | cell division cycle associated 8                                                | 508022 | 1.39 | 0.0000048 |
| PDK4      | pyruvate dehydrogenase kinase, isozyme 4                                        | 507367 | 1.38 | 0.0007245 |
| STEAP3    | STEAP family member 3                                                           | 504235 | 1.38 | 0.0000090 |
| SNTA1     | syntrophin, alpha 1 (dystrophin-associated protein A1, 59kDa, acidic component) | 527488 | 1.37 | 0.0000082 |
| KLF11     | Kruppel-like factor 11                                                          | 616730 | 1.37 | 0.0000114 |
| HSPA12B   | heat shock 70kD protein 12B                                                     | 515590 | 1.36 | 0.0000242 |
| ELN       | elastin                                                                         | 280781 | 1.36 | 0.0000760 |
| LOC788353 | similar to Uncharacterized protein KIAA1522 homolog                             | 788353 | 1.36 | 0.0000196 |
| GJC1      | gap junction protein, gamma 1, 45kDa                                            | 511119 | 1.36 | 0.0000163 |
| EMP3      | epithelial membrane protein 3                                                   | 535273 | 1.36 | 0.0000183 |
| AURKA     | aurora kinase A                                                                 | 504437 | 1.36 | 0.0000185 |
| RSBN1     | round spermatid basic protein 1                                                 | 508231 | 1.35 | 0.0000466 |
| ASF1B     | ASF1 anti-silencing function 1 homolog B ( <i>S. cerevisiae</i> )               | 510538 | 1.35 | 0.0000066 |
| CCRN4L    | CCR4 carbon catabolite repression 4-like ( <i>S. cerevisiae</i> )               | 540641 | 1.34 | 0.0000165 |
| SHCBP1    | SHC SH2-domain binding protein 1                                                | 523367 | 1.34 | 0.0000152 |
| CCDC99    | coiled-coil domain containing 99                                                | 515158 | 1.33 | 0.0000167 |
| PPP3CC    | protein phosphatase 3 (formerly 2B), catalytic subunit, gamma isoform           | 533527 | 1.33 | 0.0000049 |
| SERINC2   | serine incorporator 2                                                           | 513593 | 1.33 | 0.0000200 |
| SPSB1     | splA/ryanodine receptor domain and SOCS box containing 1                        | 504407 | 1.33 | 0.0000199 |
| TUBB2A    | tubulin, beta 2A                                                                | 281555 | 1.33 | 0.0000095 |

|            |                                                                                                                 |           |      |           |
|------------|-----------------------------------------------------------------------------------------------------------------|-----------|------|-----------|
| HMOX1      | heme oxygenase (decycling) 1                                                                                    | 513221    | 1.32 | 0.0000399 |
| ITGB3      | integrin, beta 3 (platelet glycoprotein IIIa, antigen CD61)                                                     | 282642    | 1.32 | 0.0000461 |
| DNASE1L1   | deoxyribonuclease I-like 1                                                                                      | 515176    | 1.32 | 0.0000052 |
| SLC25A20   | solute carrier family 25 (carnitine/acylcarnitine translocase), member 20                                       | 518758    | 1.32 | 0.0000126 |
| TIMP1      | TIMP metalloproteinase inhibitor 1                                                                              | 282092    | 1.31 | 0.0000052 |
| LOC533350  | similar to KIAA1451 protein                                                                                     | 533350    | 1.31 | 0.0000167 |
| C22H3ORF64 | chromosome 3 open reading frame 64 ortholog                                                                     | 508782    | 1.31 | 0.0000551 |
| EIF2C2     | eukaryotic translation initiation factor 2C, 2<br>ual-specificity tyrosine-(Y)-phosphorylation regulated kinase | 404130    | 1.31 | 0.0000072 |
| DYRK3      | 3                                                                                                               | 505149    | 1.31 | 0.0000156 |
| MYOZ3      | myozenin 3                                                                                                      | 613741    | 1.31 | 0.0011007 |
| AURKB      | aurora kinase B                                                                                                 | 360192    | 1.30 | 0.0000082 |
| SMC4       | structural maintenance of chromosomes 4                                                                         | 353350    | 1.30 | 0.0000043 |
| MYO6       | myosin VI                                                                                                       | 535127    | 1.29 | 0.0002149 |
| SMC2       | structural maintenance of chromosomes 2                                                                         | 539217    | 1.29 | 0.0000397 |
| TCF7       | transcription factor 7 (T-cell specific, HMG-box)                                                               | 782690    | 1.28 | 0.0006445 |
| CRTAC1     | cartilage acidic protein 1                                                                                      | 100139581 | 1.28 | 0.0000112 |
| CKS1B      | CDC28 protein kinase regulatory subunit 1B                                                                      | 615827    | 1.28 | 0.0000066 |
| TUBD1      | tubulin, delta 1                                                                                                | 510838    | 1.28 | 0.0000096 |
| CENP-N     | centromere protein N                                                                                            | 513551    | 1.27 | 0.0000493 |
| NPHP1      | nephronophthisis 1 (juvenile)                                                                                   | 505421    | 1.27 | 0.0000229 |
| CTSH       | cathepsin H                                                                                                     | 510524    | 1.26 | 0.0000722 |
| PPAP2B     | phosphatidic acid phosphatase type 2B                                                                           | 617707    | 1.26 | 0.0000376 |
| PCP4L1     | Purkinje cell protein 4 like 1                                                                                  | 100126444 | 1.26 | 0.0000586 |
| TMEM54     | transmembrane protein 54                                                                                        | 509773    | 1.26 | 0.0000083 |
| EZR        | ezrin                                                                                                           | 281574    | 1.26 | 0.0000421 |
| RPS6KA3    | ribosomal protein S6 kinase, 90kDa, polypeptide 3                                                               | 511190    | 1.26 | 0.0000496 |
| STK38L     | serine/threonine kinase 38 like                                                                                 | 514787    | 1.26 | 0.0000650 |
| COTL1      | coactosin-like 1 (Dictyostelium)                                                                                | 617165    | 1.26 | 0.0000915 |
| TRAF3IP2   | TRAF3 interacting protein 2                                                                                     | 616801    | 1.26 | 0.0000393 |
| ACSL6      | acyl-CoA synthetase long-chain family member 6                                                                  | 506059    | 1.26 | 0.0000087 |
| AMD1       | adenosylmethionine decarboxylase 1                                                                              | 280997    | 1.25 | 0.0000110 |
| CCNB1      | cyclin B1                                                                                                       | 327679    | 1.25 | 0.0000294 |

|           |                                                                       |        |      |           |
|-----------|-----------------------------------------------------------------------|--------|------|-----------|
| KIAA0101  | KIAA0101 protein                                                      | 540737 | 1.25 | 0.0001082 |
| MAP9      | microtubule-associated protein 9                                      | 613821 | 1.24 | 0.0001261 |
| SKA3      | spindle and kinetochore associated complex subunit 3                  | 509921 | 1.24 | 0.0000253 |
| GSPT1     | G1 to S phase transition 1                                            | 532337 | 1.24 | 0.0000147 |
| HYAL2     | hyaluronoglucosaminidase 2                                            | 281838 | 1.24 | 0.0000150 |
| FANCI     | Fanconi anemia, complementation group I                               | 522442 | 1.24 | 0.0000205 |
| POP5      | processing of precursor 5, ribonuclease P/MRP subunit (S. cerevisiae) | 507410 | 1.23 | 0.0000338 |
| PDLIM7    | PDZ and LIM domain 7 (enigma)                                         | 533851 | 1.23 | 0.0000217 |
| PARVB     | parvin, beta                                                          | 616294 | 1.23 | 0.0000106 |
| EHBP1L1   | EH domain binding protein 1-like 1                                    | 788760 | 1.23 | 0.0000953 |
| SSFA2     | sperm specific antigen 2                                              | 538826 | 1.22 | 0.0002601 |
| SGOL1     | shugoshin-like 1 (S. pombe)                                           | 614056 | 1.22 | 0.0000167 |
| IL8       | interleukin 8                                                         | 280828 | 1.22 | 0.0002920 |
| UGDH      | UDP-glucose dehydrogenase                                             | 281564 | 1.22 | 0.0000569 |
| APOL3     | apolipoprotein L, 3                                                   | 512905 | 1.21 | 0.0000086 |
| KIF2C     | kinesin family member 2C                                              | 533161 | 1.21 | 0.0000227 |
| JUP       | junction plakoglobin                                                  | 445543 | 1.21 | 0.0000333 |
| LOC518821 | similar to Centromeric protein E (CENP-E)                             | 518821 | 1.21 | 0.0000851 |
| PRC1      | protein regulator of cytokinesis 1                                    | 767818 | 1.21 | 0.0000095 |
| DEPDC7    | DEP domain containing 7                                               | 532586 | 1.20 | 0.0001096 |
| FBXO5     | F-box protein 5                                                       | 515080 | 1.20 | 0.0000171 |
| SGK1      | serum/glucocorticoid regulated kinase 1                               | 515854 | 1.19 | 0.0000180 |
| LMO7      | LIM domain 7                                                          | 539359 | 1.19 | 0.0000326 |
| AGPAT9    | 1-acylglycerol-3-phosphate O-acyltransferase 9                        | 519739 | 1.19 | 0.0005852 |
| GATA4     | GATA binding protein 4                                                | 327716 | 1.19 | 0.0001326 |
| DSN1      | DSN1, MIND kinetochore complex component, homolog (S. cerevisiae)     | 508271 | 1.19 | 0.0000177 |
| STX17     | syntaxin 17                                                           | 534304 | 1.19 | 0.0000143 |
| ORAI1     | ORAI calcium release-activated calcium modulator 1                    | 517688 | 1.18 | 0.0000419 |
| F2RL1     | coagulation factor II (thrombin) receptor-like 1                      | 526525 | 1.18 | 0.0001894 |
| NUSAP1    | nucleolar and spindle associated protein 1                            | 616028 | 1.18 | 0.0000354 |
| CENPI     | centromere protein I                                                  | 512877 | 1.18 | 0.0000165 |
| MCM10     | minichromosome maintenance complex component 10                       | 527595 | 1.18 | 0.0000169 |

|           |                                                                       |           |      |           |
|-----------|-----------------------------------------------------------------------|-----------|------|-----------|
| KIF9      | kinesin family member 9                                               | 508574    | 1.18 | 0.0004305 |
| RHOBTB1   | Rho-related BTB domain containing 1                                   | 540513    | 1.17 | 0.0000072 |
| VPS36     | vacuolar protein sorting 36 homolog ( <i>S. cerevisiae</i> )          | 511223    | 1.17 | 0.0001147 |
| PRKCI     | protein kinase C, iota                                                | 528478    | 1.17 | 0.0000121 |
| MGC148992 | similar to RGC-32                                                     | 614348    | 1.17 | 0.0001239 |
| BRCA1     | breast cancer 1, early onset                                          | 353120    | 1.16 | 0.0000354 |
| IRF6      | interferon regulatory factor 6                                        | 614253    | 1.16 | 0.0000247 |
| POLE2     | polymerase (DNA directed), epsilon 2 (p59 subunit)                    | 518653    | 1.16 | 0.0000674 |
| CDCA2     | cell division cycle associated 2                                      | 515287    | 1.16 | 0.0000234 |
| ITGA2     | integrin, alpha 2 (CD49B, alpha 2 subunit of VLA-2 receptor)          | 281872    | 1.15 | 0.0000395 |
| CRIP2     | cysteine-rich protein 2                                               | 780821    | 1.15 | 0.0000466 |
| KIF4A     | kinesin family member 4A                                              | 537127    | 1.15 | 0.0000074 |
| PLAUR     | plasminogen activator, urokinase receptor                             | 281983    | 1.15 | 0.0000163 |
| LOC510012 | similar to SCL/TAL1 interrupting locus                                | 510012    | 1.15 | 0.0000238 |
| SERPINB8  | serpin peptidase inhibitor, clade B (ovalbumin), member 8             | 513825    | 1.15 | 0.0000541 |
| NDC80     | NDC80 homolog, kinetochore complex component ( <i>S. cerevisiae</i> ) | 538789    | 1.15 | 0.0000218 |
| LOC615263 | hypothetical protein LOC615263                                        | 615263    | 1.15 | 0.0000148 |
| CSTB      | cystatin B (stefin B)                                                 | 514170    | 1.15 | 0.0000281 |
| CHMP4C    | chromatin modifying protein 4C                                        | 507572    | 1.14 | 0.0001095 |
| SYNPO     | synaptopodin                                                          | 533531    | 1.14 | 0.0000604 |
| TMEM131   | transmembrane protein 131                                             | 540861    | 1.13 | 0.0000533 |
| POGK      | pogo transposable element with KRAB domain                            | 539790    | 1.13 | 0.0000238 |
| SASH1     | SAM and SH3 domain containing 1                                       | 539603    | 1.13 | 0.0000637 |
| LOC618360 | similar to Nitric oxide-inducible gene protein                        | 618360    | 1.13 | 0.0000245 |
| FAM48A    | family with sequence similarity 48, member A                          | 534126    | 1.13 | 0.0000631 |
| RAD18     | RAD18 homolog ( <i>S. cerevisiae</i> )                                | 514440    | 1.13 | 0.0000408 |
| TK1       | thymidine kinase 1, soluble                                           | 504652    | 1.13 | 0.0000144 |
| NR4A1     | nuclear receptor subfamily 4, group A, member 1                       | 528390    | 1.13 | 0.0001069 |
| PLN       | phospholamban                                                         | 100125240 | 1.13 | 0.0002132 |
| JUNB      | jun B proto-oncogene                                                  | 514246    | 1.13 | 0.0000376 |
| PRDX1     | peroxiredoxin 1                                                       | 281997    | 1.13 | 0.0000099 |
| ATAD5     | ATPase family, AAA domain containing 5                                | 513059    | 1.12 | 0.0000257 |

|           |                                                                            |           |      |           |
|-----------|----------------------------------------------------------------------------|-----------|------|-----------|
| HAT1      | histone acetyltransferase 1                                                | 509329    | 1.12 | 0.0000166 |
| CDC6      | cell division cycle 6 homolog ( <i>S. cerevisiae</i> )                     | 515301    | 1.12 | 0.0001595 |
| IQGAP3    | IQ motif containing GTPase activating protein 3                            | 505886    | 1.12 | 0.0000175 |
| HSPA12A   | heat shock 70kDa protein 12A                                               | 540050    | 1.12 | 0.0001331 |
| CCNB2     | cyclin B2                                                                  | 281668    | 1.12 | 0.0000408 |
| KIF20A    | kinesin family member 20A                                                  | 527854    | 1.12 | 0.0000190 |
| MECOM     | MDS1 and EVI1 complex locus                                                | 532209    | 1.12 | 0.0000444 |
| FEN1      | flap structure-specific endonuclease 1                                     | 616242    | 1.11 | 0.0000254 |
| FXYD3     | FXYD domain containing ion transport regulator 3                           | 780807    | 1.11 | 0.0002234 |
| PRKCD     | protein kinase C, delta                                                    | 505708    | 1.11 | 0.0000619 |
| PRICKLE1  | prickle homolog 1 ( <i>Drosophila</i> )                                    | 785152    | 1.11 | 0.0000735 |
| MICAL2    | microtubule associated monooxygenase, calponin and LIM domain containing 2 | 534041    | 1.11 | 0.0000378 |
| DPH3      | DPH3, KTI11 homolog ( <i>S. cerevisiae</i> )                               | 511579    | 1.10 | 0.0000649 |
| RBBP8     | retinoblastoma binding protein 8                                           | 512977    | 1.10 | 0.0000167 |
| THEX1     | three prime histone mRNA exonuclease 1                                     | 540728    | 1.10 | 0.0002351 |
| LOC540455 | hypothetical protein LOC540455                                             | 540455    | 1.10 | 0.0000650 |
| MEGF9     | similar to multiple EGF-like-domains 9                                     | 533820    | 1.10 | 0.0000321 |
| IER5      | immediate early response 5                                                 | 523618    | 1.10 | 0.0000342 |
| TACC3     | transforming, acidic coiled-coil containing protein 3                      | 506194    | 1.09 | 0.0000352 |
| UHRF1     | ubiquitin-like with PHD and ring finger domains 1                          | 530411    | 1.09 | 0.0000257 |
| LOC618459 | similar to Protein FAM101B                                                 | 618459    | 1.09 | 0.0000120 |
| NCAPH     | non-SMC condensin I complex, subunit H                                     | 504477    | 1.09 | 0.0000284 |
| SPTLC2    | serine palmitoyltransferase, long chain base subunit 2                     | 537972    | 1.09 | 0.0000135 |
| SACS      | spastic ataxia of Charlevoix-Saguenay (sacsin)                             | 539378    | 1.09 | 0.0000609 |
| SRPX2     | sushi-repeat-containing protein, X-linked 2                                | 514742    | 1.08 | 0.0030843 |
| TMBIM1    | transmembrane BAX inhibitor motif containing 1                             | 404134    | 1.08 | 0.0000481 |
| TMEM45A   | transmembrane protein 45A                                                  | 509461    | 1.08 | 0.0000483 |
| ANKH      | ankylosis, progressive homolog (mouse)                                     | 511800    | 1.08 | 0.0001368 |
| LIG1      | ligase I, DNA, ATP-dependent                                               | 100124507 | 1.08 | 0.0000204 |
| UNC93A    | unc-93 homolog A ( <i>C. elegans</i> )                                     | 613535    | 1.07 | 0.0002772 |
| CHORDC1   | cysteine and histidine-rich domain (CHORD)-containing 1                    | 505144    | 1.07 | 0.0001214 |
| BUB1B     | budding uninhibited by benzimidazoles 1 homolog beta (yeast)               | 537027    | 1.07 | 0.0000155 |

|              |                                                              |           |      |           |
|--------------|--------------------------------------------------------------|-----------|------|-----------|
| MAP3K8       | mitogen-activated protein kinase kinase kinase 8             | 535622    | 1.07 | 0.0000790 |
| UBE2C        | ubiquitin-conjugating enzyme E2C                             | 506962    | 1.07 | 0.0000199 |
| GLO1         | glyoxalase I                                                 | 540335    | 1.07 | 0.0000462 |
| TXN          | thioredoxin                                                  | 280950    | 1.07 | 0.0000107 |
|              | similar to malignant fibrous histiocytoma amplified sequence |           |      |           |
| LOC782395    | 1                                                            | 782395    | 1.06 | 0.0000460 |
| DNAJA4       | DnaJ (Hsp40) homolog, subfamily A, member 4                  | 528615    | 1.06 | 0.0000193 |
| LMNA         | lamin A/C                                                    | 404144    | 1.06 | 0.0000259 |
| CD47         | CD47 molecule                                                | 282661    | 1.06 | 0.0000111 |
| ENO2         | enolase 2 (gamma, neuronal)                                  | 526006    | 1.06 | 0.0001765 |
| MLEC         | malectin                                                     | 515309    | 1.06 | 0.0000887 |
| KLF10        | Kruppel-like factor 10                                       | 522795    | 1.06 | 0.0000460 |
| SLPI         | secretory leukocyte peptidase inhibitor                      | 504598    | 1.06 | 0.0076782 |
| SEC61A2      | Sec61 alpha 2 subunit ( <i>S. cerevisiae</i> )               | 614128    | 1.05 | 0.0002651 |
| SBDS         | Shwachman-Bodian-Diamond syndrome                            | 513237    | 1.05 | 0.0000399 |
| AIDA         | axin interactor, dorsalization associated                    | 508353    | 1.05 | 0.0001169 |
| LOC100138230 | similar to Huntingtin interacting protein K                  | 100138230 | 1.05 | 0.0000276 |
| ACTR6        | ARP6 actin-related protein 6 homolog (yeast)                 | 613596    | 1.04 | 0.0000393 |
| RCC2         | regulator of chromosome condensation 2                       | 509120    | 1.04 | 0.0000601 |
| CENPF        | centromere protein F, 350/400ka (mitosin)                    | 533089    | 1.04 | 0.0001898 |
| LGTN         | ligatin                                                      | 511844    | 1.04 | 0.0000720 |
| FGF1         | fibroblast growth factor 1 (acidic)                          | 281160    | 1.04 | 0.0001186 |
| TOP2A        | topoisomerase (DNA) II alpha 170kDa                          | 787696    | 1.04 | 0.0001090 |
| MAP2K1       | mitogen-activated protein kinase kinase 1                    | 533199    | 1.04 | 0.0000339 |
| RHBDL2       | rhomboid, veinlet-like 2 ( <i>Drosophila</i> )               | 514943    | 1.04 | 0.0000156 |
|              | Cbp/p300-interacting transactivator, with Glu/Asp-rich       |           |      |           |
| CITED4       | carboxy-terminal domain, 4                                   | 504742    | 1.04 | 0.0000848 |
| LOC619120    | similar to Protein FAM65A                                    | 619120    | 1.03 | 0.0000441 |
| PHLDA1       | pleckstrin homology-like domain, family A, member 1          | 540135    | 1.03 | 0.0000275 |
| RFC4         | replication factor C (activator 1) 4, 37kDa                  | 504637    | 1.03 | 0.0000827 |
| MCM3         | minichromosome maintenance complex component 3               | 281302    | 1.03 | 0.0000598 |
| KPNA4        | karyopherin alpha 4 (importin alpha 3)                       | 535090    | 1.02 | 0.0001229 |
| PKM2         | pyruvate kinase, muscle                                      | 512571    | 1.02 | 0.0000474 |
| AVL9         | AVL9 homolog ( <i>S. cerevisiae</i> )                        | 534141    | 1.02 | 0.0000358 |

|           |                                                                                                                                                                                                                           |        |       |           |
|-----------|---------------------------------------------------------------------------------------------------------------------------------------------------------------------------------------------------------------------------|--------|-------|-----------|
| SAR1B     | SAR1 homolog B ( <i>S. cerevisiae</i> )                                                                                                                                                                                   | 515999 | 1.02  | 0.0000349 |
| FBP2      | fructose-1,6-bisphosphatase 2                                                                                                                                                                                             | 514066 | 1.01  | 0.0003098 |
| LIMS2     | LIM and senescent cell antigen-like domains 2                                                                                                                                                                             | 515401 | 1.01  | 0.0000276 |
| GIN3      | GIN3 complex subunit 3 (Psf3 homolog)                                                                                                                                                                                     | 538943 | 1.01  | 0.0007958 |
| MGAT4A    | mannosyl (alpha-1,3-)-glycoprotein beta-1,4-N-acetylglucosaminyltransferase, isozyme A                                                                                                                                    | 282276 | 1.01  | 0.0000883 |
| RPA2      | replication protein A2, 32kDa                                                                                                                                                                                             | 507912 | 1.01  | 0.0002582 |
| ACOT2     | acyl-CoA thioesterase 2                                                                                                                                                                                                   | 511033 | 1.00  | 0.0001468 |
| ME1       | malic enzyme 1, NADP(+)-dependent, cytosolic                                                                                                                                                                              | 540985 | 1.00  | 0.0000417 |
| ACSL5     | acyl-CoA synthetase long-chain family member 5                                                                                                                                                                            | 514159 | 1.00  | 0.0000272 |
| AKR1C4    | aldo-keto reductase family 1, member C4 (chlordecone reductase; 3-alpha hydroxysteroid dehydrogenase, type I; dihydrodiol dehydrogenase 4)                                                                                | 282138 | 1.00  | 0.0006018 |
| PIGW      | phosphatidylinositol glycan anchor biosynthesis, class W                                                                                                                                                                  | 768052 | 1.00  | 0.0000407 |
| FABP4     | fatty acid binding protein 4, adipocyte                                                                                                                                                                                   | 281759 | -5.11 | 0.0000010 |
| MGC127538 | hypothetical protein MGC127538                                                                                                                                                                                            | 767920 | -4.77 | 0.0000008 |
| FABP5     | fatty acid binding protein 5 (psoriasis-associated)                                                                                                                                                                       | 281760 | -3.48 | 0.0000002 |
| OLFML3    | olfactomedin-like 3                                                                                                                                                                                                       | 505318 | -3.23 | 0.0000061 |
| SDC2      | syndecan 2                                                                                                                                                                                                                | 615785 | -3.18 | 0.0000009 |
| COL6A3    | collagen, type VI, alpha 3                                                                                                                                                                                                | 530657 | -3.14 | 0.0000388 |
| DHRS3     | dehydrogenase/reductase (SDR family) member 3                                                                                                                                                                             | 281482 | -3.08 | 0.0000005 |
| PRUNE2    | prune homolog 2 ( <i>Drosophila</i> )                                                                                                                                                                                     | 518308 | -3.07 | 0.0000001 |
| SCARA5    | scavenger receptor class A, member 5 (putative)                                                                                                                                                                           | 516087 | -2.86 | 0.0000127 |
| RBM3      | RNA binding motif (RNP1, RRM) protein 3                                                                                                                                                                                   | 509771 | -2.82 | 0.0000014 |
| SDPR      | serum deprivation response (phosphatidylserine binding protein)                                                                                                                                                           | 532333 | -2.77 | 0.0000215 |
| SNN       | stannin                                                                                                                                                                                                                   | 615361 | -2.73 | 0.0000014 |
| EMCN      | endomucin                                                                                                                                                                                                                 | 616367 | -2.73 | 0.0000009 |
| LOC539690 | similar to Complement component C1q receptor precursor (Complement component 1 q subcomponent receptor 1) (C1qR) (C1qRp) (C1qR(p)) (C1q/MBL/SPA receptor) (Matrix-remodeling-associated protein 4) (CD93 antigen) (CDw93) | 539690 | -2.56 | 0.0000074 |
| LOC509972 | similar to C-type lectin domain family 2, member d11                                                                                                                                                                      | 509972 | -2.55 | 0.0000085 |

|           |                                                                                                            |        |       |           |
|-----------|------------------------------------------------------------------------------------------------------------|--------|-------|-----------|
| LOC614047 | hypothetical protein LOC614047                                                                             | 614047 | -2.51 | 0.0000010 |
| SST       | somatostatin                                                                                               | 280932 | -2.48 | 0.0000257 |
| ABCA1     | ATP-binding cassette, sub-family A (ABC1), member 1                                                        | 535379 | -2.41 | 0.0000094 |
| CXCL5     | chemokine (C-X-C motif) ligand 5                                                                           | 281735 | -2.40 | 0.0029137 |
| BMP4      | bone morphogenetic protein 4                                                                               | 407216 | -2.38 | 0.0000021 |
| NTRK2     | neurotrophic tyrosine kinase, receptor, type 2                                                             | 505824 | -2.37 | 0.0000069 |
| TTR       | transthyretin                                                                                              | 280948 | -2.30 | 0.0000286 |
| PGF       | placental growth factor                                                                                    | 280894 | -2.27 | 0.0000009 |
| PPP1R16B  | protein phosphatase 1, regulatory (inhibitor) subunit 16B                                                  | 282091 | -2.25 | 0.0000039 |
| EGR1      | early growth response 1                                                                                    | 407125 | -2.24 | 0.0001157 |
| WNT11     | wingless-type MMTV integration site family, member 11                                                      | 613288 | -2.24 | 0.0000006 |
| CCL26     | chemokine (C-C motif) ligand 26                                                                            | 508387 | -2.19 | 0.0000223 |
| ARHGEF11  | Rho guanine nucleotide exchange factor (GEF) 11                                                            | 511220 | -2.13 | 0.0001917 |
| RGL1      | ral guanine nucleotide dissociation stimulator-like 1                                                      | 522344 | -2.13 | 0.0000008 |
| GSTT1     | glutathione S-transferase theta 1                                                                          | 517724 | -2.06 | 0.0000009 |
| KLF15     | Kruppel-like factor 15                                                                                     | 407241 | -2.00 | 0.0000018 |
| ZNF608    | zinc finger protein 608                                                                                    | 509992 | -1.99 | 0.0000072 |
| AFAP1L1   | actin filament associated protein 1-like 1                                                                 | 510738 | -1.98 | 0.0000009 |
| IL20RA    | interleukin 20 receptor, alpha                                                                             | 509038 | -1.98 | 0.0000069 |
| PLXDC2    | plexin domain containing 2                                                                                 | 515731 | -1.98 | 0.0000021 |
| LDOC1     | leucine zipper, down-regulated in cancer 1                                                                 | 616591 | -1.98 | 0.0000012 |
| NOV       | nephroblastoma overexpressed                                                                               | 505727 | -1.96 | 0.0000124 |
| CIRBP     | cold inducible RNA binding protein                                                                         | 507120 | -1.95 | 0.0000180 |
| GAMT      | guanidinoacetate N-methyltransferase                                                                       | 515270 | -1.94 | 0.0000008 |
| MXRA5     | matrix-remodelling associated 5                                                                            | 786844 | -1.94 | 0.0000291 |
| NRG1      | neuregulin 1                                                                                               | 281361 | -1.93 | 0.0000039 |
| ASCL1     | achaete-scute complex homolog 1 (Drosophila)                                                               | 540473 | -1.93 | 0.0017583 |
| ADM       | adrenomedullin                                                                                             | 280713 | -1.93 | 0.0000234 |
| LRRC33    | leucine rich repeat containing 33                                                                          | 510688 | -1.92 | 0.0000061 |
| LOC524694 | similar to Paladin                                                                                         | 524694 | -1.91 | 0.0000607 |
|           | similar to high-risk human papilloma viruses E6<br>oncoproteins targeted protein E6TP1 alpha; putative GAP |        |       |           |
| LOC534839 | protein alpha                                                                                              | 534839 | -1.90 | 0.0000059 |
| FADS2     | fatty acid desaturase 2                                                                                    | 521822 | -1.88 | 0.0000215 |

|           |                                                                    |        |       |           |
|-----------|--------------------------------------------------------------------|--------|-------|-----------|
| RNF183    | ring finger protein 183                                            | 539200 | -1.85 | 0.0000041 |
| MT1E      | metallothionein 1E                                                 | 613358 | -1.84 | 0.0028373 |
| MARCKS    | myristoylated alanine-rich protein kinase C substrate              | 613548 | -1.83 | 0.0000048 |
| RCSD1     | RCSD domain containing 1                                           | 512205 | -1.79 | 0.0000120 |
| SH3KBP1   | SH3-domain kinase binding protein 1                                | 510489 | -1.79 | 0.0000095 |
| NRBP2     | nuclear receptor binding protein 2                                 | 504664 | -1.79 | 0.0000085 |
| CHST7     | carbohydrate (N-acetylglucosamine 6-O) sulfotransferase 7          | 540357 | -1.77 | 0.0000079 |
| TXNIP     | thioredoxin interacting protein                                    | 506790 | -1.76 | 0.0000854 |
| KBTBD6    | kelch repeat and BTB (POZ) domain containing 6                     | 538461 | -1.76 | 0.0001095 |
| GATM      | glycine amidinotransferase (L-arginine:glycine amidinotransferase) | 414732 | -1.76 | 0.0001244 |
| FAM129A   | family with sequence similarity 129, member A                      | 614787 | -1.75 | 0.0000019 |
| CFH       | complement factor H                                                | 280816 | -1.74 | 0.0000167 |
| VCAM1     | vascular cell adhesion molecule 1                                  | 282118 | -1.74 | 0.0027898 |
| THBD      | thrombomodulin                                                     | 281529 | -1.73 | 0.0000040 |
| BNIP3     | BCL2/adenovirus E1B 19kDa interacting protein 3                    | 615342 | -1.73 | 0.0000062 |
| TCP11L2   | t-complex 11 (mouse)-like 2                                        | 541012 | -1.72 | 0.0000152 |
| CAV1      | caveolin 1, caveolae protein, 22kDa                                | 281040 | -1.71 | 0.0000061 |
| CSF2      | colony stimulating factor 2 (granulocyte-macrophage)               | 281095 | -1.70 | 0.0000526 |
| HAS2      | hyaluronan synthase 2                                              | 281220 | -1.70 | 0.0005234 |
| ZFP36L1   | zinc finger protein 36, C3H type-like 1                            | 614773 | -1.69 | 0.0000584 |
| SEPP1     | selenoprotein P, plasma, 1                                         | 282066 | -1.68 | 0.0000185 |
| MT1E      | metallothionein 1E                                                 | 404071 | -1.68 | 0.0035607 |
| AOC3      | amine oxidase, copper containing 3 (vascular adhesion protein 1)   | 281002 | -1.68 | 0.0000850 |
| PDLIM4    | PDZ and LIM domain 4                                               | 515410 | -1.67 | 0.0000043 |
| APOA1     | apolipoprotein A-I                                                 | 281631 | -1.65 | 0.0000090 |
| IL7       | interleukin 7                                                      | 280827 | -1.65 | 0.0000328 |
| VEGFA     | vascular endothelial growth factor A                               | 281572 | -1.64 | 0.0000074 |
| NEIL2     | nei like 2 (E. coli)                                               | 444987 | -1.64 | 0.0000020 |
| LOC511229 | similar to mCG142710                                               | 511229 | -1.63 | 0.0000167 |
| TRPM6     | transient receptor potential cation channel, subfamily M, member 6 | 527597 | -1.62 | 0.0000735 |
| MMP11     | matrix metalloproteinase 11 (stromelysin 3)                        | 539109 | -1.61 | 0.0000039 |

|              |                                                                                          |           |       |           |
|--------------|------------------------------------------------------------------------------------------|-----------|-------|-----------|
| SPRY1        | sprouty homolog 1, antagonist of FGF signaling (Drosophila)                              | 507095    | -1.60 | 0.0000112 |
| SLAMF8       | SLAM family member 8                                                                     | 514609    | -1.60 | 0.0000042 |
| SLITRK2      | SLIT and NTRK-like family, member 2                                                      | 540117    | -1.60 | 0.0002827 |
| UBA7         | ubiquitin-like modifier activating enzyme 7                                              | 497204    | -1.59 | 0.0000171 |
| CBX6         | chromobox homolog 6                                                                      | 513830    | -1.59 | 0.0000076 |
| LOC100125763 | neuronal protein 3.1                                                                     | 100125763 | -1.59 | 0.0000094 |
| WISP2        | WNT1 inducible signaling pathway protein 2                                               | 534658    | -1.58 | 0.0000069 |
| LOC781004    | hypothetical LOC781004                                                                   | 781004    | -1.57 | 0.0000062 |
| LOC515042    | similar to leucine-rich-domain inter-acting protein 1; LeR inter-acting protein 1; LEAP1 | 515042    | -1.57 | 0.0000018 |
| WDFY2        | WD repeat and FYVE domain containing 2                                                   | 523432    | -1.56 | 0.0000043 |
| VEGFB        | vascular endothelial growth factor B                                                     | 282121    | -1.56 | 0.0000167 |
| RSF1         | remodeling and spacing factor 1                                                          | 541248    | -1.56 | 0.0002105 |
| LGALS9       | lectin, galactoside-binding, soluble, 9                                                  | 510813    | -1.55 | 0.0000155 |
| MGC128424    | hypothetical protein MGC128424                                                           | 767924    | -1.54 | 0.0000115 |
| ICAM3        | intercellular adhesion molecule 3                                                        | 281840    | -1.54 | 0.0000778 |
| CNRIP1       | cannabinoid receptor interacting protein 1                                               | 539715    | -1.53 | 0.0000052 |
| SRL          | sarcalumenin                                                                             | 513912    | -1.51 | 0.0000054 |
| VAMP5        | vesicle-associated membrane protein 5 (myobrevin)                                        | 540406    | -1.50 | 0.0000063 |
| DDAH1        | dimethylarginine dimethylaminohydrolase 1                                                | 537391    | -1.49 | 0.0000046 |
| ENTPD1       | ectonucleoside triphosphate diphosphohydrolase 1                                         | 282223    | -1.48 | 0.0000609 |
| TNC          | tenascin C                                                                               | 540664    | -1.48 | 0.0000862 |
| PHLDB2       | pleckstrin homology-like domain, family B, member 2                                      | 509784    | -1.47 | 0.0000048 |
| RNPEP        | arginyl aminopeptidase (aminopeptidase B)                                                | 282040    | -1.46 | 0.0000064 |
| ISG12(B)     | similar to TLH29 protein precursor                                                       | 617420    | -1.46 | 0.0000287 |
| TBC1D8       | TBC1 domain family, member 8 (with GRAM domain)                                          | 527162    | -1.46 | 0.0000085 |
| MDK          | midkine (neurite growth-promoting factor 2)                                              | 280852    | -1.46 | 0.0000150 |
| RND3         | Rho family GTPase 3                                                                      | 540224    | -1.46 | 0.0000063 |
| N4BP2L1      | NEDD4 binding protein 2-like 1                                                           | 616069    | -1.45 | 0.0000702 |
| PDIA5        | protein disulfide isomerase family A, member 5                                           | 511603    | -1.45 | 0.0000092 |
| CXCL2        | chemokine (C-X-C motif) ligand 2                                                         | 613667    | -1.44 | 0.0021504 |
| SCD          | stearoyl-CoA desaturase (delta-9-desaturase)                                             | 280924    | -1.44 | 0.0002694 |
| COL15A1      | collagen, type XV, alpha 1                                                               | 100139730 | -1.44 | 0.0017955 |
| MGST3        | microsomal glutathione S-transferase 3                                                   | 507346    | -1.44 | 0.0000095 |

|              |                                                                                  |           |       |           |
|--------------|----------------------------------------------------------------------------------|-----------|-------|-----------|
| SCML1        | sex comb on midleg-like 1 ( <i>Drosophila</i> )                                  | 786670    | -1.43 | 0.0000048 |
| HOXA5        | homeobox A5                                                                      | 768039    | -1.43 | 0.0000063 |
| CCDC85B      | coiled-coil domain containing 85B                                                | 540332    | -1.43 | 0.0000044 |
| NTS          | neurotensin                                                                      | 280881    | -1.42 | 0.0018248 |
| AMIGO2       | adhesion molecule with Ig-like domain 2                                          | 514273    | -1.42 | 0.0000076 |
| TSPYL4       | TSPY-like 4                                                                      | 508104    | -1.41 | 0.0000089 |
| GPR125       | G protein-coupled receptor 125                                                   | 541147    | -1.41 | 0.0000041 |
| AGFG2        | ArfGAP with FG repeats 2                                                         | 510361    | -1.40 | 0.0000350 |
| COL12A1      | collagen, type XII, alpha 1                                                      | 359712    | -1.40 | 0.0000149 |
| RGS7         | regulator of G-protein signaling 7                                               | 281452    | -1.38 | 0.0000155 |
| RP2          | retinitis pigmentosa 2 (X-linked recessive)                                      | 534054    | -1.38 | 0.0001391 |
| LOC616969    | Rho-guanine nucleotide exchange factor                                           | 616969    | -1.37 | 0.0000065 |
| MCF2L        | MCF.2 cell line derived transforming sequence-like                               | 505595    | -1.37 | 0.0000477 |
| ASPH         | aspartate beta-hydroxylase                                                       | 286771    | -1.37 | 0.0000227 |
| LOC538778    | similar to dapper 1                                                              | 538778    | -1.37 | 0.0000631 |
| ECHDC2       | enoyl Coenzyme A hydratase domain containing 2                                   | 513795    | -1.36 | 0.0000057 |
| BMPER        | BMP binding endothelial regulator                                                | 534101    | -1.34 | 0.0000514 |
| LOC784007    | similar to LOC496253 protein                                                     | 784007    | -1.34 | 0.0000642 |
| LOC526200    | similar to Absent in melanoma 1 protein                                          | 526200    | -1.33 | 0.0000709 |
| LOC100196901 | hypothetical LOC100196901                                                        | 100196901 | -1.33 | 0.0000517 |
| SERPINA5     | serpin peptidase inhibitor, clade A (alpha-1 antitrypsin, antitrypsin), member 5 | 338050    | -1.33 | 0.0000700 |
| GAB1         | GRB2-associated binding protein 1                                                | 540085    | -1.33 | 0.0000936 |
| LOC535166    | similar to mKIAA1077 protein                                                     | 535166    | -1.32 | 0.0005091 |
| JAM3         | junctional adhesion molecule 3                                                   | 513412    | -1.32 | 0.0000095 |
| TIFA         | TRAF-interacting protein with forkhead-associated domain                         | 783855    | -1.32 | 0.0000521 |
| UNC119       | unc-119 homolog ( <i>C. elegans</i> )                                            | 538501    | -1.32 | 0.0000061 |
| LRIG1        | leucine-rich repeats and immunoglobulin-like domains 1                           | 505750    | -1.32 | 0.0000393 |
| SGSH         | N-sulfoglucosamine sulfohydrolase                                                | 535442    | -1.31 | 0.0000051 |
| PIK3CD       | phosphoinositide-3-kinase, catalytic, delta polypeptide                          | 504531    | -1.30 | 0.0000165 |
| CDKN1C       | cyclin-dependent kinase inhibitor 1C (p57, Kip2)                                 | 510972    | -1.30 | 0.0001811 |
| ALDH7A1      | aldehyde dehydrogenase 7 family, member A1                                       | 507477    | -1.29 | 0.0002366 |
| NME4         | non-metastatic cells 4, protein expressed in                                     | 789324    | -1.29 | 0.0000068 |
| MAP2K6       | mitogen-activated protein kinase kinase 6                                        | 286883    | -1.28 | 0.0000194 |

|             |                                                                                                                                                                                                                                        |        |       |           |
|-------------|----------------------------------------------------------------------------------------------------------------------------------------------------------------------------------------------------------------------------------------|--------|-------|-----------|
|             | SWI/SNF related, matrix associated, actin dependent                                                                                                                                                                                    |        |       |           |
| SMARCA2     | regulator of chromatin, subfamily a, member 2                                                                                                                                                                                          | 540904 | -1.28 | 0.0000098 |
| PPP1R3B     | protein phosphatase 1, regulatory (inhibitor) subunit 3B                                                                                                                                                                               | 514428 | -1.27 | 0.0000180 |
| HMGA1       | high mobility group AT-hook 1                                                                                                                                                                                                          | 618849 | -1.27 | 0.0000324 |
| LOC529052   | similar to F55A4.8a                                                                                                                                                                                                                    | 529052 | -1.27 | 0.0000123 |
| CRIM1       | cysteine rich transmembrane BMP regulator 1 (chordin-like)                                                                                                                                                                             | 506264 | -1.27 | 0.0000157 |
| COX7A1      | cytochrome c oxidase subunit VIIa polypeptide 1 (muscle)                                                                                                                                                                               | 338086 | -1.27 | 0.0000082 |
| SYTL2       | synaptotagmin-like 2                                                                                                                                                                                                                   | 614406 | -1.26 | 0.0001722 |
| YPEL3       | yippee-like 3 (Drosophila)                                                                                                                                                                                                             | 787498 | -1.26 | 0.0000103 |
| LIX1L       | Lix1 homolog (mouse)-like                                                                                                                                                                                                              | 788858 | -1.26 | 0.0000308 |
| CHRNB1      | cholinergic receptor, nicotinic, beta 1 (muscle)                                                                                                                                                                                       | 282179 | -1.26 | 0.0000072 |
| VEGFC       | vascular endothelial growth factor C                                                                                                                                                                                                   | 282122 | -1.26 | 0.0000167 |
| ZNF462      | zinc finger protein 462                                                                                                                                                                                                                | 515561 | -1.26 | 0.0001176 |
| COMMD1      | copper metabolism (Murr1) domain containing 1                                                                                                                                                                                          | 534683 | -1.25 | 0.0000089 |
| C19H17ORF28 | chromosome 17 open reading frame 28 ortholog                                                                                                                                                                                           | 540436 | -1.25 | 0.0000748 |
| TPPP3       | tubulin polymerization-promoting protein family member 3                                                                                                                                                                               | 614988 | -1.25 | 0.0000184 |
| LOC507141   | CE5 protein-like                                                                                                                                                                                                                       | 507141 | -1.25 | 0.0000080 |
| PTGDS       | prostaglandin D2 synthase 21kDa (brain)                                                                                                                                                                                                | 286858 | -1.25 | 0.0000171 |
| SLC22A17    | solute carrier family 22, member 17                                                                                                                                                                                                    | 539848 | -1.25 | 0.0003853 |
|             | similar to Probable global transcription activator SNF2L1<br>(Nucleosome-remodeling factor subunit SNF2L) (ATP-<br>dependent helicase SMARCA1) (SWI/SNF-related matrix-<br>associated actin-dependent regulator of chromatin subfamily |        |       |           |
| LOC535439   | A member 1)                                                                                                                                                                                                                            | 535439 | -1.24 | 0.0000661 |
| NTHL1       | nth endonuclease III-like 1 (E. coli)                                                                                                                                                                                                  | 535203 | -1.24 | 0.0000093 |
| PBXIP1      | pre-B-cell leukemia homeobox interacting protein 1                                                                                                                                                                                     | 506485 | -1.24 | 0.0000070 |
| LOC540312   | similar to Protein DDX26B                                                                                                                                                                                                              | 540312 | -1.24 | 0.0000994 |
| CXCR4       | chemokine (C-X-C motif) receptor 4                                                                                                                                                                                                     | 281736 | -1.23 | 0.0022377 |
| RSPRY1      | ring finger and SPRY domain containing 1                                                                                                                                                                                               | 538571 | -1.23 | 0.0000135 |
| PIK3IP1     | phosphoinositide-3-kinase interacting protein 1                                                                                                                                                                                        | 512082 | -1.23 | 0.0000405 |
| SEPT4       | septin 4                                                                                                                                                                                                                               | 538801 | -1.22 | 0.0000095 |
|             | Cbp/p300-interacting transactivator, with Glu/Asp-rich                                                                                                                                                                                 |        |       |           |
| CITED2      | carboxy-terminal domain, 2                                                                                                                                                                                                             | 521378 | -1.22 | 0.0003377 |
| METTTL2     | methyltransferase like 12                                                                                                                                                                                                              | 512401 | -1.22 | 0.0000483 |

|           |                                                                                   |        |       |           |
|-----------|-----------------------------------------------------------------------------------|--------|-------|-----------|
| ST3GAL5   | ST3 beta-galactoside alpha-2,3-sialyltransferase 5                                | 404164 | -1.22 | 0.0000143 |
| EIF4E3    | eukaryotic translation initiation factor 4E family member 3                       | 616906 | -1.21 | 0.0002595 |
| WASF1     | WAS protein family, member 1                                                      | 531488 | -1.21 | 0.0000317 |
| SLCO2A1   | solute carrier organic anion transporter family, member 2A1                       | 282468 | -1.21 | 0.0000947 |
| NFIL3     | nuclear factor, interleukin 3 regulated                                           | 506097 | -1.20 | 0.0000461 |
| S100A16   | S100 calcium binding protein A16                                                  | 505679 | -1.20 | 0.0000298 |
| MAP1LC3A  | microtubule-associated protein 1 light chain 3 alpha                              | 514547 | -1.20 | 0.0000316 |
| PSAT1     | phosphoserine aminotransferase 1                                                  | 533044 | -1.20 | 0.0007964 |
| FASN      | fatty acid synthase                                                               | 281152 | -1.20 | 0.0001350 |
| TMOD1     | tropomodulin 1                                                                    | 780784 | -1.20 | 0.0001894 |
| DDT       | D-dopachrome tautomerase                                                          | 615999 | -1.20 | 0.0000122 |
| KCNJ2     | potassium inwardly-rectifying channel, subfamily J, member 2                      | 281883 | -1.19 | 0.0039708 |
| LOC512304 | similar to ectonucleotide pyrophosphatase/phosphodiesterase 5 (putative function) | 512304 | -1.19 | 0.0000208 |
| CLEC2D    | C-type lectin domain family 2, member D                                           | 617565 | -1.19 | 0.0001097 |
| HIVEP1    | human immunodeficiency virus type I enhancer binding protein 1                    | 529115 | -1.19 | 0.0000112 |
| CRYBA4    | crystallin, beta A4                                                               | 282204 | -1.19 | 0.0000159 |
| IFI6      | interferon, alpha-inducible protein 6                                             | 512913 | -1.18 | 0.0000196 |
| IGFBP4    | insulin-like growth factor binding protein 4                                      | 282262 | -1.17 | 0.0000936 |
| TC2N      | tandem C2 domains, nuclear                                                        | 534419 | -1.17 | 0.0000352 |
| LOC534672 | similar to family with sequence similarity 20, member C                           | 534672 | -1.17 | 0.0000242 |
| LOC539374 | similar to Family with sequence similarity 43, member A                           | 539374 | -1.16 | 0.0000169 |
| ANXA11    | annexin A11                                                                       | 282142 | -1.16 | 0.0000309 |
| LOC507983 | similar to KIAA1728 protein                                                       | 507983 | -1.16 | 0.0000325 |
| ACOX2     | acyl-Coenzyme A oxidase 2, branched chain                                         | 514969 | -1.16 | 0.0000215 |
| GNG11     | guanine nucleotide binding protein (G protein), gamma 11                          | 511812 | -1.15 | 0.0000165 |
| LOC615936 | similar to autism susceptibility candidate 2                                      | 615936 | -1.15 | 0.0001084 |
| EEF2K     | eukaryotic elongation factor-2 kinase                                             | 521730 | -1.15 | 0.0000103 |
| TIMP2     | TIMP metalloproteinase inhibitor 2                                                | 282093 | -1.15 | 0.0001159 |
| MGC128008 | hypothetical LOC510399                                                            | 510399 | -1.15 | 0.0000460 |
| LOC784866 | hypothetical LOC784866                                                            | 784866 | -1.14 | 0.0000121 |

|           |                                                             |           |       |           |
|-----------|-------------------------------------------------------------|-----------|-------|-----------|
|           | sparc/osteonectin, cwcv and kazal-like domains proteoglycan |           |       |           |
| SPOCK2    | (testican) 2                                                | 523846    | -1.14 | 0.0003339 |
| CADM1     | cell adhesion molecule 1                                    | 529873    | -1.14 | 0.0000953 |
| RTP4      | receptor (chemosensory) transporter protein 4               | 532442    | -1.14 | 0.0009939 |
| OSBPL11   | oxysterol binding protein-like 11                           | 538576    | -1.14 | 0.0000521 |
| ZNF503    | zinc finger protein 503                                     | 789846    | -1.14 | 0.0000416 |
| ENPP2     | ectonucleotide pyrophosphatase/phosphodiesterase 2          | 532663    | -1.14 | 0.0000462 |
| HINT2     | histidine triad nucleotide binding protein 2                | 281816    | -1.14 | 0.0000165 |
| PEAR1     | platelet endothelial aggregation receptor 1                 | 787112    | -1.14 | 0.0000120 |
| CMTM3     | CKLF-like MARVEL transmembrane domain containing 3          | 787512    | -1.13 | 0.0000394 |
| FBXL20    | F-box and leucine-rich repeat protein 20                    | 511007    | -1.13 | 0.0000131 |
| IFIT2     | interferon-induced protein with tetratricopeptide repeats 2 | 527528    | -1.13 | 0.0021501 |
| ERO1L     | ERO1-like ( <i>S. cerevisiae</i> )                          | 100125317 | -1.13 | 0.0047819 |
| WARS      | tryptophanyl-tRNA synthetase                                | 281576    | -1.12 | 0.0000183 |
| LMCD1     | LIM and cysteine-rich domains 1                             | 540474    | -1.12 | 0.0025153 |
|           | ectonucleotide pyrophosphatase/phosphodiesterase 4          |           |       |           |
| ENPP4     | (putative function)                                         | 538583    | -1.11 | 0.0001786 |
| PXMP2     | peroxisomal membrane protein 2, 22kDa                       | 508609    | -1.11 | 0.0001982 |
| EFNA5     | ephrin-A5                                                   | 616742    | -1.10 | 0.0000326 |
|           | LFNG O-fucosylpeptide 3-beta-N-                             |           |       |           |
| LFNG      | acetylglucosaminyltransferase                               | 516209    | -1.10 | 0.0000625 |
| AVPR1A    | arginine vasopressin receptor 1A                            | 538439    | -1.10 | 0.0004043 |
| ABLIM1    | actin binding LIM protein 1                                 | 504968    | -1.10 | 0.0000112 |
| VCAN      | versican                                                    | 282662    | -1.10 | 0.0000393 |
| LOC535887 | similar to pantothenate kinase 1                            | 535887    | -1.10 | 0.0055952 |
| MIPEP     | mitochondrial intermediate peptidase                        | 517531    | -1.10 | 0.0000179 |
| GALM      | galactose mutarotase (aldose 1-epimerase)                   | 616676    | -1.09 | 0.0000247 |
| RHOT1     | ras homolog gene family, member T1                          | 511257    | -1.09 | 0.0000156 |
|           | protein phosphatase 2 (formerly 2A), regulatory subunit B,  |           |       |           |
| PPP2R2A   | alpha isoform                                               | 508045    | -1.09 | 0.0000138 |
|           | proteasome (prosome, macropain) activator subunit 1 (PA28   |           |       |           |
| PSME1     | alpha)                                                      | 510041    | -1.08 | 0.0000337 |
| KLHL23    | kelch-like 23 ( <i>Drosophila</i> )                         | 100140861 | -1.08 | 0.0001317 |
| FIG4      | FIG4 homolog ( <i>S. cerevisiae</i> )                       | 534118    | -1.08 | 0.0000200 |

|         |                                                                                                              |           |       |           |
|---------|--------------------------------------------------------------------------------------------------------------|-----------|-------|-----------|
| MOCOS   | molybdenum cofactor sulfurase                                                                                | 281226    | -1.07 | 0.0000700 |
| ZNF292  | zinc finger protein 292                                                                                      | 541264    | -1.07 | 0.0000551 |
| IPO11   | importin 11                                                                                                  | 538236    | -1.06 | 0.0000858 |
| IGFBP3  | insulin-like growth factor binding protein 3                                                                 | 282261    | -1.06 | 0.0006117 |
| DPYD    | dihydropyrimidine dehydrogenase                                                                              | 281124    | -1.06 | 0.0000666 |
| TBC1D12 | TBC1 domain family, member 12                                                                                | 509093    | -1.06 | 0.0000280 |
| SYNGR1  | synaptogyrin 1                                                                                               | 534995    | -1.06 | 0.0000183 |
| CPEB1   | cytoplasmic polyadenylation element binding protein 1                                                        | 514174    | -1.06 | 0.0000428 |
| SYNM    | synemin, intermediate filament protein                                                                       | 514186    | -1.06 | 0.0001060 |
| FHL1    | four and a half LIM domains 1                                                                                | 509056    | -1.06 | 0.0000169 |
| ANP32A  | acidic (leucine-rich) nuclear phosphoprotein 32 family,<br>member A                                          | 538427    | -1.05 | 0.0000667 |
| CDS2    | CDP-diacylglycerol synthase (phosphatidate<br>cytidylyltransferase) 2                                        | 614834    | -1.05 | 0.0000243 |
| CCRL1   | chemokine (C-C motif) receptor-like 1                                                                        | 281672    | -1.05 | 0.0035105 |
| AHNAK2  | AHNAK nucleoprotein 2                                                                                        | 527701    | -1.05 | 0.0000167 |
| GRAMD1C | GRAM domain containing 1C                                                                                    | 505581    | -1.05 | 0.0000779 |
| NFIB    | nuclear factor I/B                                                                                           | 538474    | -1.05 | 0.0000771 |
| IDUA    | iduronidase, alpha-L-<br>proteasome (prosome, macropain) subunit, beta type, 9 (large                        | 511050    | -1.05 | 0.0000461 |
| PSMB9   | multifunctional peptidase 2)                                                                                 | 510593    | -1.05 | 0.0001498 |
| CADM4   | cell adhesion molecule 4                                                                                     | 523277    | -1.04 | 0.0000907 |
| NT5E    | 5'-nucleotidase, ecto (CD73)                                                                                 | 281363    | -1.04 | 0.0001074 |
| STX10   | syntaxin 10                                                                                                  | 525379    | -1.04 | 0.0000168 |
| BDH2    | 3-hydroxybutyrate dehydrogenase, type 2                                                                      | 515321    | -1.04 | 0.0000947 |
| RELL1   | RELT-like 1                                                                                                  | 768210    | -1.03 | 0.0000339 |
| MMP1    | matrix metalloproteinase 1 (interstitial collagenase)<br>BMP and activin membrane-bound inhibitor homolog    | 281308    | -1.03 | 0.0015825 |
| BAMBI   | (Xenopus laevis)                                                                                             | 530147    | -1.03 | 0.0002098 |
| GSN     | gelsolin (amyloidosis, Finnish type)                                                                         | 535077    | -1.03 | 0.0000535 |
| RAPGEF2 | Rap guanine nucleotide exchange factor (GEF) 2                                                               | 100139484 | -1.03 | 0.0000155 |
| GCSH    | glycine cleavage system protein H (aminomethyl carrier)<br>UDP-N-acetyl-alpha-D-galactosamine:polypeptide N- | 317723    | -1.03 | 0.0000987 |
| GALNTL4 | acetylgalactosaminyltransferase-like 4                                                                       | 614203    | -1.03 | 0.0000340 |

|           |                                                              |           |       |           |
|-----------|--------------------------------------------------------------|-----------|-------|-----------|
| PAGE4     | P antigen family, member 4 (prostate associated)             | 505725    | -1.03 | 0.0001979 |
| FST       | follistatin                                                  | 327681    | -1.03 | 0.0009974 |
| NETO2     | neuropilin (NRP) and tolloid (TLL)-like 2                    | 520056    | -1.02 | 0.0000336 |
| MYLIP     | myosin regulatory light chain interacting protein            | 541070    | -1.02 | 0.0005559 |
| SLC29A1   | solute carrier family 29 (nucleoside transporters), member 1 | 510932    | -1.02 | 0.0002318 |
| ICA1      | islet cell autoantigen 1, 69kDa                              | 535346    | -1.02 | 0.0000387 |
| NRP1      | neuropilin 1                                                 | 539369    | -1.02 | 0.0006813 |
|           | isoamyl acetate-hydrolyzing esterase 1 homolog (S.           |           |       |           |
| IAH1      | cerevisiae)                                                  | 614320    | -1.02 | 0.0000601 |
| MEIS1     | Meis homeobox 1                                              | 613877    | -1.01 | 0.0000925 |
| SLC38A9   | solute carrier family 38, member 9                           | 534045    | -1.01 | 0.0000308 |
| UNC13B    | unc-13 homolog B (C. elegans)                                | 530692    | -1.01 | 0.0000216 |
| PDGFRL    | platelet-derived growth factor receptor-like                 | 515017    | -1.01 | 0.0000449 |
|           | amyloid beta precursor protein (cytoplasmic tail) binding    |           |       |           |
| APPBP2    | protein 2                                                    | 505734    | -1.01 | 0.0000980 |
| FRMD6     | FERM domain containing 6                                     | 530910    | -1.01 | 0.0003716 |
| DIP2C     | DIP2 disco-interacting protein 2 homolog C (Drosophila)      | 535136    | -1.01 | 0.0000127 |
| RPS6KL1   | ribosomal protein S6 kinase-like 1                           | 530047    | -1.01 | 0.0000336 |
| UPK1B     | uroplakin 1B                                                 | 282113    | -1.01 | 0.0009277 |
| CST3      | cystatin C                                                   | 281102    | -1.00 | 0.0000179 |
| LOC783163 | similar to protein phosphatase 4, regulatory subunit 1       | 783163    | -1.00 | 0.0000609 |
| PATZ1     | POZ (BTB) and AT hook containing zinc finger 1               | 532416    | -1.00 | 0.0000486 |
| SSLP-1    | secreted seminal vesicle Ly-6 protein 1                      | 100125878 | -1.00 | 0.0001040 |

\*Significantly enriched or depleted genes were identified between ECs exposed to high WSS (10 Pa) and no flow static cultures (0 Pa) by a linear model approach employing an empirical Bayes method at 1% FDR and more than two-fold change between groups. The ratio of the log<sub>2</sub> fold change along with the adjusted FDR p-value are indicated.

Table S2. Differentially expressed genes between normal WSS and static control treated cells\*

| Symbol    | Description                                                                                   | Gene ID | Ratio | Adjusted <i>p</i> value |
|-----------|-----------------------------------------------------------------------------------------------|---------|-------|-------------------------|
| CXCL12    | chemokine (C-X-C motif) ligand 12 (stromal cell-derived factor 1)                             | 613811  | 4.20  | 0.0000121               |
| SELP      | selectin P                                                                                    | 281486  | 3.25  | 0.0000121               |
| CYB561    | cytochrome b-561                                                                              | 317663  | 3.24  | 0.0000151               |
| IL1F6     | interleukin 1 family, member 6 (epsilon)                                                      | 523429  | 3.06  | 0.0001047               |
| SELE      | selectin E                                                                                    | 281484  | 3.02  | 0.0001047               |
| SERPINE1  | serpin peptidase inhibitor, clade E (nexin, plasminogen activator inhibitor type 1), member 1 | 281375  | 2.94  | 0.0000121               |
| HES1      | hairy and enhancer of split 1, (Drosophila)                                                   | 539547  | 2.67  | 0.0000251               |
| IL8       | interleukin 8                                                                                 | 280828  | 2.62  | 0.0000251               |
| SRPX2     | sushi-repeat-containing protein, X-linked 2                                                   | 514742  | 2.48  | 0.0001307               |
| DECR1     | 2,4-dienoyl CoA reductase 1, mitochondrial                                                    | 509952  | 2.48  | 0.0002166               |
| CCDC80    | coiled-coil domain containing 80                                                              | 515235  | 2.47  | 0.0000033               |
| NQO1      | NAD(P)H dehydrogenase, quinone 1                                                              | 519632  | 2.46  | 0.0000033               |
| ANO1      | anoctamin 1, calcium activated chloride channel                                               | 532126  | 2.45  | 0.0001195               |
| ISG20     | interferon stimulated exonuclease gene 20kDa                                                  | 506604  | 2.38  | 0.0000378               |
| CSRP2     | cysteine and glycine-rich protein 2                                                           | 539381  | 2.33  | 0.0000033               |
| CAMK1D    | calcium/calmodulin-dependent protein kinase ID                                                | 526873  | 2.30  | 0.0000416               |
| SKIL      | SKI-like oncogene                                                                             | 527910  | 2.20  | 0.0000126               |
| PLEK2     | pleckstrin 2                                                                                  | 784941  | 2.16  | 0.0000033               |
| SRXN1     | sulfiredoxin 1 homolog ( <i>S. cerevisiae</i> )                                               | 531606  | 2.12  | 0.0000151               |
| SLC39A8   | solute carrier family 39 (zinc transporter), member 8                                         | 508193  | 2.12  | 0.0000783               |
| TAGLN     | transgelin                                                                                    | 513463  | 2.02  | 0.0000556               |
| MGC148992 | similar to RGC-32                                                                             | 614348  | 2.00  | 0.0000377               |
| ENG       | endoglin                                                                                      | 615844  | 1.93  | 0.0000571               |
| FAT1      | FAT tumor suppressor homolog 1 (Drosophila)                                                   | 508251  | 1.86  | 0.0000393               |
| PI3       | peptidase inhibitor 3, skin-derived (SKALP)                                                   | 407165  | 1.85  | 0.0008737               |
| LOC615685 | UPF0452 protein C7orf41 homolog                                                               | 615685  | 1.82  | 0.0000259               |
| ELOVL4    | elongation of very long chain fatty acids (FEN1/Elo2, SUR4/Elo3, yeast)-like 4                | 532015  | 1.81  | 0.0000756               |

|              |                                                               |           |      |           |
|--------------|---------------------------------------------------------------|-----------|------|-----------|
| TXNRD1       | thioredoxin reductase 1                                       | 282388    | 1.80 | 0.0000324 |
| NCAPG        | non-SMC condensin I complex, subunit G                        | 531234    | 1.76 | 0.0000179 |
| PLVAP        | plasmalemma vesicle associated protein                        | 524990    | 1.74 | 0.0005784 |
| LAP3         | leucine aminopeptidase 3                                      | 781648    | 1.73 | 0.0000126 |
| NCEH1        | neutral cholesterol ester hydrolase 1                         | 534212    | 1.73 | 0.0000927 |
| PDK4         | pyruvate dehydrogenase kinase, isozyme 4                      | 507367    | 1.72 | 0.0006777 |
| FLRT2        | similar to KIAA0405                                           | 539905    | 1.72 | 0.0000121 |
| PMEPA1       | prostate transmembrane protein, androgen induced 1            | 617469    | 1.69 | 0.0000783 |
| CXCL2        | chemokine (C-X-C motif) ligand 2                              | 281212    | 1.69 | 0.0005255 |
| STBD1        | starch binding domain 1                                       | 513376    | 1.69 | 0.0000918 |
| MGC165862    | hypothetical LOC614805                                        | 614805    | 1.68 | 0.0000571 |
| RPRM         | reprimin, TP53 dependent G2 arrest mediator candidate         | 614739    | 1.66 | 0.0006152 |
| LOC100270684 | hypothetical protein LOC100270684                             | 100270684 | 1.66 | 0.0002068 |
| EXOC3L2      | exocyst complex component 3-like 2                            | 539328    | 1.60 | 0.0004446 |
| CTSH         | cathepsin H                                                   | 510524    | 1.60 | 0.0000930 |
| AXL          | AXL receptor tyrosine kinase                                  | 516598    | 1.59 | 0.0000930 |
| ALAS1        | aminolevulinic acid, delta-, synthase 1                       | 534286    | 1.58 | 0.0000204 |
| SGK1         | serum/glucocorticoid regulated kinase 1                       | 515854    | 1.58 | 0.0000220 |
| PHLDA1       | pleckstrin homology-like domain, family A, member 1           | 540135    | 1.56 | 0.0000173 |
| NOS3         | nitric oxide synthase 3 (endothelial cell)                    | 287024    | 1.55 | 0.0006201 |
| TACC1        | transforming, acidic coiled-coil containing protein 1         | 507012    | 1.53 | 0.0000121 |
| LOC520939    | similar to Krueppel-like factor 2 (Lung krueppel-like factor) | 520939    | 1.52 | 0.0000388 |
| ENC1         | ectodermal-neural cortex (with BTB-like domain)               | 617091    | 1.51 | 0.0000393 |
| TCF7         | transcription factor 7 (T-cell specific, HMG-box)             | 782690    | 1.51 | 0.0008156 |
| PRM1         | protamine 1                                                   | 281423    | 1.50 | 0.0003217 |
| GATA2        | GATA binding protein 2                                        | 506809    | 1.47 | 0.0000316 |
| CSTB         | cystatin B (stefin B)                                         | 514170    | 1.46 | 0.0000386 |
| FBXO32       | F-box protein 32                                              | 513776    | 1.45 | 0.0000121 |
| PLK3         | polo-like kinase 3 (Drosophila)                               | 504282    | 1.44 | 0.0000204 |
| STEAP3       | STEAP family member 3                                         | 504235    | 1.42 | 0.0000378 |
| CLCA3P       | chloride channel accessory 3 (pseudogene)                     | 281694    | 1.42 | 0.0001470 |
| LBH          | limb bud and heart development homolog (mouse)                | 616148    | 1.41 | 0.0002255 |
| HMOX1        | heme oxygenase (decycling) 1                                  | 513221    | 1.39 | 0.0001283 |
| ANLN         | anillin, actin binding protein                                | 518274    | 1.39 | 0.0005665 |

|            |                                                                 |        |      |           |
|------------|-----------------------------------------------------------------|--------|------|-----------|
| COL18A1    | collagen, type XVIII, alpha 1                                   | 508076 | 1.37 | 0.0000769 |
|            | nuclear factor of kappa light polypeptide gene enhancer in B-   |        |      |           |
| NFKBIZ     | cells inhibitor, zeta                                           | 282713 | 1.35 | 0.0005622 |
| EID3       | EP300 interacting inhibitor of differentiation 3                | 507232 | 1.35 | 0.0004883 |
| AFF1       | AF4/FMR2 family, member 1                                       | 781149 | 1.34 | 0.0004036 |
| PMP22      | peripheral myelin protein 22                                    | 534497 | 1.33 | 0.0001065 |
| NPPC       | natriuretic peptide precursor C                                 | 281356 | 1.33 | 0.0002966 |
| UGDH       | UDP-glucose dehydrogenase                                       | 281564 | 1.33 | 0.0001504 |
| TRAF3IP2   | TRAF3 interacting protein 2                                     | 616801 | 1.33 | 0.0001231 |
| TMC6       | transmembrane channel-like 6                                    | 505575 | 1.32 | 0.0002664 |
| IL18R1     | interleukin 18 receptor 1                                       | 407221 | 1.31 | 0.0017451 |
| FHL2       | four and a half LIM domains 2                                   | 510008 | 1.30 | 0.0002825 |
| MYADM      | myeloid-associated differentiation marker                       | 506295 | 1.30 | 0.0000744 |
| AQP1       | aquaporin 1 (Colton blood group)                                | 282653 | 1.29 | 0.0032938 |
| CSGALNACT2 | chondroitin sulfate N-acetylgalactosaminyltransferase 2         | 509328 | 1.29 | 0.0000381 |
| DEPDC7     | DEP domain containing 7                                         | 532586 | 1.27 | 0.0003056 |
| BLVRB      | biliverdin reductase B (flavin reductase (NADPH))               | 281650 | 1.27 | 0.0000386 |
| LOC615263  | hypothetical protein LOC615263                                  | 615263 | 1.25 | 0.0000427 |
| HEY1       | hairy/enhancer-of-split related with YRPW motif 1               | 408005 | 1.25 | 0.0016835 |
| PRSS23     | protease, serine, 23                                            | 538575 | 1.24 | 0.0000393 |
|            | inhibitor of DNA binding 1, dominant negative helix-loop-       |        |      |           |
| ID1        | helix protein                                                   | 497011 | 1.24 | 0.0001739 |
| ANKH       | ankylosis, progressive homolog (mouse)                          | 511800 | 1.24 | 0.0000783 |
| FBN1       | fibrillin 1                                                     | 281154 | 1.24 | 0.0000571 |
| PODXL      | podocalyxin-like                                                | 616366 | 1.23 | 0.0005840 |
|            | solute carrier family 25 (carnitine/acylcarnitine translocase), |        |      |           |
| SLC25A20   | member 20                                                       | 518758 | 1.23 | 0.0000796 |
| ATF3       | activating transcription factor 3                               | 515266 | 1.23 | 0.0000586 |
| FAM48A     | family with sequence similarity 48, member A                    | 534126 | 1.22 | 0.0001739 |
| COTL1      | coactosin-like 1 (Dictyostelium)                                | 617165 | 1.21 | 0.0004055 |
| DNASE1L1   | deoxyribonuclease I-like 1                                      | 515176 | 1.21 | 0.0000378 |
| IL1R1      | interleukin 1 receptor, type I                                  | 515640 | 1.19 | 0.0003989 |
| SLC41A2    | solute carrier family 41, member 2                              | 524417 | 1.19 | 0.0000796 |
| GCLM       | glutamate-cysteine ligase, modifier subunit                     | 525659 | 1.18 | 0.0000783 |

|           |                                                                                                            |           |      |           |
|-----------|------------------------------------------------------------------------------------------------------------|-----------|------|-----------|
| MALL      | mal, T-cell differentiation protein-like                                                                   | 512289    | 1.17 | 0.0001448 |
| SLC9A3R2  | solute carrier family 9 (sodium/hydrogen exchanger), member 3 regulator 2                                  | 768005    | 1.17 | 0.0001944 |
| LOC507627 | similar to SLAM family member 9                                                                            | 507627    | 1.17 | 0.0001456 |
| SNTA1     | syntrophin, alpha 1 (dystrophin-associated protein A1, 59kDa, acidic component)                            | 527488    | 1.17 | 0.0000796 |
| TMEM45A   | transmembrane protein 45A                                                                                  | 509461    | 1.15 | 0.0001469 |
| RBP4      | retinol binding protein 4, plasma                                                                          | 281444    | 1.15 | 0.0004649 |
| LOC532244 | similar to microtubule associated monooxygenase, calponin and LIM domain containing 3                      | 532244    | 1.15 | 0.0001992 |
| NQO2      | NAD(P)H dehydrogenase, quinone 2                                                                           | 508566    | 1.15 | 0.0002903 |
| SACS      | spastic ataxia of Charlevoix-Saguenay (sacsin)                                                             | 539378    | 1.14 | 0.0001919 |
| SQRDL     | sulfide quinone reductase-like (yeast)                                                                     | 507858    | 1.14 | 0.0001052 |
| NUDT22    | nudix (nucleoside diphosphate linked moiety X)-type motif 22                                               | 533578    | 1.13 | 0.0001210 |
| ABHD5     | abhydrolase domain containing 5                                                                            | 535588    | 1.13 | 0.0000869 |
| ITGB3     | integrin, beta 3 (platelet glycoprotein IIIa, antigen CD61)                                                | 282642    | 1.13 | 0.0003972 |
| SASH1     | SAM and SH3 domain containing 1                                                                            | 539603    | 1.13 | 0.0002567 |
| PRICKLE1  | prickle homolog 1 (Drosophila)                                                                             | 785152    | 1.13 | 0.0001470 |
| CD200     | CD200 molecule                                                                                             | 534910    | 1.12 | 0.0009257 |
| RHBDL2    | rhomboid, veinlet-like 2 (Drosophila)                                                                      | 514943    | 1.12 | 0.0000481 |
| MYO6      | myosin VI                                                                                                  | 535127    | 1.12 | 0.0014408 |
| PLIN2     | perilipin 2                                                                                                | 280981    | 1.11 | 0.0002651 |
| PCP4L1    | Purkinje cell protein 4 like 1                                                                             | 100126444 | 1.09 | 0.0004682 |
| SYNPO     | synaptopodin                                                                                               | 533531    | 1.09 | 0.0002883 |
| THBS1     | thrombospondin 1                                                                                           | 281530    | 1.09 | 0.0073629 |
| H4        | histone H4                                                                                                 | 280691    | 1.09 | 0.0008893 |
| NFATC4    | nuclear factor of activated T-cells, cytoplasmic, calcineurin-dependent 4                                  | 788119    | 1.08 | 0.0003309 |
| SCFD2     | sec1 family domain containing 2                                                                            | 535130    | 1.08 | 0.0002255 |
| SULT1B1   | sulfotransferase family, cytosolic, 1B, member 1                                                           | 521920    | 1.08 | 0.0096442 |
| LOC787330 | similar to Intersectin-2 (SH3 domain-containing protein 1B) (SH3P18) (SH3P18-like WASP-associated protein) | 787330    | 1.08 | 0.0001327 |
| APOL3     | apolipoprotein L, 3                                                                                        | 512905    | 1.07 | 0.0000769 |
| RSBN1     | round spermatid basic protein 1                                                                            | 508231    | 1.07 | 0.0005681 |

|              |                                                                            |           |       |           |
|--------------|----------------------------------------------------------------------------|-----------|-------|-----------|
| PPAP2B       | phosphatidic acid phosphatase type 2B                                      | 617707    | 1.07  | 0.0004898 |
| OIP5         | Opa interacting protein 5                                                  | 511100    | 1.07  | 0.0005784 |
| ABHD2        | abhydrolase domain containing 2                                            | 508717    | 1.06  | 0.0002114 |
| NCAPG2       | non-SMC condensin II complex, subunit G2                                   | 516644    | 1.05  | 0.0001703 |
| FGF2         | fibroblast growth factor 2 (basic)                                         | 281161    | 1.05  | 0.0004233 |
| ARF4         | ADP-ribosylation factor 4                                                  | 282601    | 1.05  | 0.0000581 |
| TUBD1        | tubulin, delta 1                                                           | 510838    | 1.05  | 0.0001141 |
| CBR1         | carbonyl reductase 1                                                       | 515946    | 1.04  | 0.0006201 |
| NET1         | neuroepithelial cell transforming gene 1                                   | 507365    | 1.04  | 0.0000975 |
| FOXM1        | forkhead box M1                                                            | 513643    | 1.04  | 0.0002034 |
| LOC100196898 | hypothetical LOC100196898                                                  | 100196898 | 1.04  | 0.0006915 |
| PPP3CC       | protein phosphatase 3 (formerly 2B), catalytic subunit, gamma isoform      | 533527    | 1.04  | 0.0000744 |
| MICAL2       | microtubule associated monooxygenase, calponin and LIM domain containing 2 | 534041    | 1.04  | 0.0002034 |
| GPR116       | G protein-coupled receptor 116                                             | 532674    | 1.04  | 0.0003127 |
| CHMP4C       | chromatin modifying protein 4C                                             | 507572    | 1.03  | 0.0001068 |
| TEK          | TEK tyrosine kinase, endothelial                                           | 280939    | 1.03  | 0.0000783 |
| TSPAN6       | tetraspanin 6                                                              | 514741    | 1.03  | 0.0002966 |
| CRYAB        | crystallin, alpha B                                                        | 281719    | 1.02  | 0.0026049 |
| TPX2         | TPX2, microtubule-associated, homolog ( <i>Xenopus laevis</i> )            | 507226    | 1.02  | 0.0000780 |
| MTMR11       | myotubularin related protein 11                                            | 506122    | 1.01  | 0.0002616 |
| ID2          | inhibitor of DNA binding 2, dominant negative helix-loop-helix protein     | 505025    | 1.01  | 0.0000878 |
| ESPL1        | extra spindle pole bodies homolog 1 ( <i>S. cerevisiae</i> )               | 506740    | 1.00  | 0.0004871 |
| ECT2         | epithelial cell transforming sequence 2 oncogene                           | 504746    | 1.00  | 0.0001601 |
| SERINC2      | serine incorporator 2                                                      | 513593    | 1.00  | 0.0003426 |
| FABP4        | fatty acid binding protein 4, adipocyte                                    | 281759    | -3.42 | 0.0000324 |
| EMCN         | endomucin                                                                  | 616367    | -2.94 | 0.0000033 |
| OLFML3       | olfactomedin-like 3                                                        | 505318    | -2.61 | 0.0000769 |
| SDPR         | serum deprivation response (phosphatidylserine binding protein)            | 532333    | -2.57 | 0.0001364 |
| RBM3         | RNA binding motif (RNP1, RRM) protein 3                                    | 509771    | -2.56 | 0.0000121 |
| PPP1R16B     | protein phosphatase 1, regulatory (inhibitor) subunit 16B                  | 282091    | -2.43 | 0.0000121 |

|           |                                                                                                                                                                                                                            |        |       |           |
|-----------|----------------------------------------------------------------------------------------------------------------------------------------------------------------------------------------------------------------------------|--------|-------|-----------|
| LOC509972 | similar to C-type lectin domain family 2, member d11                                                                                                                                                                       | 509972 | -2.43 | 0.0000516 |
| EGR1      | early growth response 1                                                                                                                                                                                                    | 407125 | -2.42 | 0.0002903 |
| LOC512304 | similar to ectonucleotide pyrophosphatase/phosphodiesterase 5<br>(putative function)                                                                                                                                       | 512304 | -2.40 | 0.0000215 |
| SNN       | stannin                                                                                                                                                                                                                    | 615361 | -2.37 | 0.0000121 |
| ABCA1     | ATP-binding cassette, sub-family A (ABC1), member 1                                                                                                                                                                        | 535379 | -2.33 | 0.0000524 |
| MGC127538 | hypothetical protein MGC127538                                                                                                                                                                                             | 767920 | -2.31 | 0.0001172 |
| LDOC1     | leucine zipper, down-regulated in cancer 1                                                                                                                                                                                 | 616591 | -2.26 | 0.0000033 |
| KCNJ2     | potassium inwardly-rectifying channel, subfamily J, member 2                                                                                                                                                               | 281883 | -2.21 | 0.0004442 |
| LOC614047 | hypothetical protein LOC614047                                                                                                                                                                                             | 614047 | -2.21 | 0.0000111 |
| FADS2     | fatty acid desaturase 2                                                                                                                                                                                                    | 521822 | -2.20 | 0.0000454 |
| FABP5     | fatty acid binding protein 5 (psoriasis-associated)                                                                                                                                                                        | 281760 | -2.15 | 0.0000097 |
| WNT11     | wingless-type MMTV integration site family, member 11                                                                                                                                                                      | 613288 | -2.15 | 0.0000033 |
| GATM      | glycine amidinotransferase (L-arginine:glycine<br>amidinotransferase)                                                                                                                                                      | 414732 | -2.09 | 0.0001968 |
| TXNIP     | thioredoxin interacting protein                                                                                                                                                                                            | 506790 | -2.04 | 0.0001601 |
| PGF       | placental growth factor                                                                                                                                                                                                    | 280894 | -2.02 | 0.0000090 |
| LOC524694 | similar to Paladin                                                                                                                                                                                                         | 524694 | -2.01 | 0.0001839 |
| SCD       | stearoyl-CoA desaturase (delta-9-desaturase)                                                                                                                                                                               | 280924 | -2.01 | 0.0001739 |
| MARCKS    | myristoylated alanine-rich protein kinase C substrate                                                                                                                                                                      | 613548 | -2.00 | 0.0000138 |
| IL20RA    | interleukin 20 receptor, alpha                                                                                                                                                                                             | 509038 | -1.93 | 0.0000378 |
| SLITRK2   | SLIT and NTRK-like family, member 2                                                                                                                                                                                        | 540117 | -1.92 | 0.0003735 |
| ISG12(B)  | similar to TLH29 protein precursor                                                                                                                                                                                         | 617420 | -1.88 | 0.0000381 |
| LDB2      | LIM domain binding 2                                                                                                                                                                                                       | 617976 | -1.84 | 0.0000246 |
| AOC3      | amine oxidase, copper containing 3 (vascular adhesion protein<br>1)                                                                                                                                                        | 281002 | -1.84 | 0.0002034 |
| DHRS3     | dehydrogenase/reductase (SDR family) member 3                                                                                                                                                                              | 281482 | -1.80 | 0.0000314 |
| CIRBP     | cold inducible RNA binding protein                                                                                                                                                                                         | 507120 | -1.74 | 0.0001390 |
| LOC539690 | similar to Complement component C1q receptor precursor<br>(Complement component 1 q subcomponent receptor 1)<br>(C1qR) (C1qRp) (C1qR(p)) (C1q/MBL/SPA receptor)<br>(Matrix-remodeling-associated protein 4) (CD93 antigen) | 539690 | -1.74 | 0.0002034 |
| ICAM3     | intercellular adhesion molecule 3                                                                                                                                                                                          | 281840 | -1.72 | 0.0001739 |
| NTS       | neurotensin                                                                                                                                                                                                                | 280881 | -1.72 | 0.0017820 |

|           |                                                                                                                                                                                                                                                                                                             |           |       |           |
|-----------|-------------------------------------------------------------------------------------------------------------------------------------------------------------------------------------------------------------------------------------------------------------------------------------------------------------|-----------|-------|-----------|
| PSAT1     | phosphoserine aminotransferase 1                                                                                                                                                                                                                                                                            | 533044    | -1.70 | 0.0004026 |
| ZNF608    | zinc finger protein 608                                                                                                                                                                                                                                                                                     | 509992    | -1.70 | 0.0000744 |
| COL15A1   | collagen, type XV, alpha 1                                                                                                                                                                                                                                                                                  | 100139730 | -1.69 | 0.0019927 |
| LRRC33    | leucine rich repeat containing 33                                                                                                                                                                                                                                                                           | 510688    | -1.68 | 0.0000523 |
| LOC535166 | similar to mKIAA1077 protein                                                                                                                                                                                                                                                                                | 535166    | -1.66 | 0.0004890 |
| PLAU      | plasminogen activator, urokinase                                                                                                                                                                                                                                                                            | 281408    | -1.63 | 0.0000571 |
| FAM129A   | family with sequence similarity 129, member A<br>BMP and activin membrane-bound inhibitor homolog                                                                                                                                                                                                           | 614787    | -1.63 | 0.0000121 |
| BAMBI     | ( <i>Xenopus laevis</i> )                                                                                                                                                                                                                                                                                   | 530147    | -1.60 | 0.0000888 |
| COL6A3    | collagen, type VI, alpha 3                                                                                                                                                                                                                                                                                  | 530657    | -1.58 | 0.0042244 |
| CHST7     | carbohydrate (N-acetylglucosamine 6-O) sulfotransferase 7                                                                                                                                                                                                                                                   | 540357    | -1.56 | 0.0000674 |
| UPK1B     | uroplakin 1B                                                                                                                                                                                                                                                                                                | 282113    | -1.56 | 0.0002940 |
| RGL1      | ral guanine nucleotide dissociation stimulator-like 1                                                                                                                                                                                                                                                       | 522344    | -1.55 | 0.0000151 |
| LOC532409 | similar to high-mobility group box 3                                                                                                                                                                                                                                                                        | 532409    | -1.55 | 0.0008584 |
| EPAS1     | endothelial PAS domain protein 1                                                                                                                                                                                                                                                                            | 282711    | -1.52 | 0.0001778 |
| INSIG1    | insulin induced gene 1                                                                                                                                                                                                                                                                                      | 511899    | -1.52 | 0.0012556 |
| MGST3     | microsomal glutathione S-transferase 3                                                                                                                                                                                                                                                                      | 507346    | -1.51 | 0.0000372 |
| SDC2      | syndecan 2                                                                                                                                                                                                                                                                                                  | 615785    | -1.51 | 0.0001365 |
| CFH       | complement factor H                                                                                                                                                                                                                                                                                         | 280816    | -1.51 | 0.0001508 |
| SOCS2     | suppressor of cytokine signaling 2                                                                                                                                                                                                                                                                          | 338437    | -1.47 | 0.0026654 |
| GSTT1     | glutathione S-transferase theta 1                                                                                                                                                                                                                                                                           | 517724    | -1.47 | 0.0000209 |
| ST3GAL5   | ST3 beta-galactoside alpha-2,3-sialyltransferase 5<br>similar to Probable global transcription activator SNF2L1<br>(Nucleosome-remodeling factor subunit SNF2L) (ATP-<br>dependent helicase SMARCA1) (SWI/SNF-related matrix-<br>associated actin-dependent regulator of chromatin subfamily A<br>member 1) | 404164    | -1.46 | 0.0000280 |
| LOC535439 | member 1)                                                                                                                                                                                                                                                                                                   | 535439    | -1.44 | 0.0001283 |
| LGALS9    | lectin, galactoside-binding, soluble, 9                                                                                                                                                                                                                                                                     | 510813    | -1.44 | 0.0000975 |
| VAMP5     | vesicle-associated membrane protein 5 (myobrevin)                                                                                                                                                                                                                                                           | 540406    | -1.42 | 0.0000380 |
| IDI1      | isopentenyl-diphosphate delta isomerase 1                                                                                                                                                                                                                                                                   | 514293    | -1.37 | 0.0008488 |
| VEGFA     | vascular endothelial growth factor A                                                                                                                                                                                                                                                                        | 281572    | -1.37 | 0.0000825 |
| ENPP4     | ectonucleotide pyrophosphatase/phosphodiesterase 4 (putative<br>function)                                                                                                                                                                                                                                   | 538583    | -1.36 | 0.0002241 |
| SPRY1     | sprouty homolog 1, antagonist of FGF signaling ( <i>Drosophila</i> )                                                                                                                                                                                                                                        | 507095    | -1.35 | 0.0001132 |

|            |                                                                                  |        |       |           |
|------------|----------------------------------------------------------------------------------|--------|-------|-----------|
| LOC781004  | hypothetical LOC781004                                                           | 781004 | -1.35 | 0.0000577 |
| CAV1       | caveolin 1, caveolae protein, 22kDa                                              | 281040 | -1.34 | 0.0000852 |
| NOV        | nephroblastoma overexpressed                                                     | 505727 | -1.34 | 0.0003372 |
| MMP11      | matrix metalloproteinase 11 (stromelysin 3)                                      | 539109 | -1.31 | 0.0000393 |
| ENTPD1     | ectonucleoside triphosphate diphosphohydrolase 1                                 | 282223 | -1.31 | 0.0004387 |
| IL4R       | interleukin 4 receptor                                                           | 404154 | -1.29 | 0.0000904 |
| NEIL2      | nei like 2 (E. coli)                                                             | 444987 | -1.29 | 0.0000289 |
| SRL        | sarcalumenin                                                                     | 513912 | -1.29 | 0.0000511 |
| SERPINA5   | serpin peptidase inhibitor, clade A (alpha-1 antitrypsin, antitrypsin), member 5 | 338050 | -1.28 | 0.0003224 |
| MAP2K6     | mitogen-activated protein kinase kinase 6                                        | 286883 | -1.26 | 0.0000930 |
| PKIG       | protein kinase (cAMP-dependent, catalytic) inhibitor gamma                       | 404169 | -1.25 | 0.0000975 |
| FDFT1      | farnesyl-diphosphate farnesyltransferase 1                                       | 281767 | -1.25 | 0.0000874 |
| C1H21ORF63 | chromosome 21 open reading frame 63 ortholog                                     | 516536 | -1.24 | 0.0016137 |
| NFIB       | nuclear factor I/B                                                               | 538474 | -1.23 | 0.0001361 |
| CNRIP1     | cannabinoid receptor interacting protein 1                                       | 539715 | -1.22 | 0.0000706 |
| CPEB1      | cytoplasmic polyadenylation element binding protein 1                            | 514174 | -1.22 | 0.0000925 |
| IL7        | interleukin 7                                                                    | 280827 | -1.22 | 0.0005784 |
| IPO11      | importin 11                                                                      | 538236 | -1.22 | 0.0001703 |
| LFNG       | LFNG O-fucosylpeptide 3-beta-N-acetylglucosaminyltransferase                     | 516209 | -1.21 | 0.0001601 |
| BMPER      | BMP binding endothelial regulator                                                | 534101 | -1.20 | 0.0003447 |
| FASN       | fatty acid synthase                                                              | 281152 | -1.20 | 0.0004872 |
| KLF15      | Kruppel-like factor 15                                                           | 407241 | -1.20 | 0.0000975 |
| EHD3       | EH-domain containing 3                                                           | 510183 | -1.19 | 0.0001021 |
| ANP32A     | acidic (leucine-rich) nuclear phosphoprotein 32 family, member A                 | 538427 | -1.19 | 0.0001470 |
| MARCKSL1   | MARCKS-like 1                                                                    | 539555 | -1.19 | 0.0001565 |
| DIP2C      | DIP2 disco-interacting protein 2 homolog C (Drosophila)                          | 535136 | -1.19 | 0.0000276 |
| PRUNE2     | prune homolog 2 (Drosophila)                                                     | 518308 | -1.18 | 0.0000393 |
| PLXDC2     | plexin domain containing 2                                                       | 515731 | -1.18 | 0.0001087 |
| IFIT2      | interferon-induced protein with tetratricopeptide repeats 2                      | 527528 | -1.18 | 0.0040681 |
| ZFP36L1    | zinc finger protein 36, C3H type-like 1                                          | 614773 | -1.18 | 0.0013203 |
| GPR125     | G protein-coupled receptor 125                                                   | 541147 | -1.18 | 0.0000388 |

|              |                                                                             |           |       |           |
|--------------|-----------------------------------------------------------------------------|-----------|-------|-----------|
| MGST1        | microsomal glutathione S-transferase 1                                      | 493719    | -1.17 | 0.0018042 |
| AFAP1L1      | actin filament associated protein 1-like 1                                  | 510738    | -1.17 | 0.0000542 |
| ISG12(A)     | similar to putative ISG12(a) protein                                        | 507138    | -1.16 | 0.0006495 |
| PIK3IP1      | phosphoinositide-3-kinase interacting protein 1                             | 512082    | -1.16 | 0.0002068 |
| UBA7         | ubiquitin-like modifier activating enzyme 7                                 | 497204    | -1.16 | 0.0003489 |
| EIF4E3       | eukaryotic translation initiation factor 4E family member 3                 | 616906    | -1.16 | 0.0010510 |
| TNIK         | TRAF2 and NCK interacting kinase                                            | 539627    | -1.15 | 0.0012557 |
| LMO2         | LIM domain only 2 (rhombotin-like 1)                                        | 614876    | -1.15 | 0.0005784 |
| SSLP-1       | secreted seminal vesicle Ly-6 protein 1                                     | 100125878 | -1.15 | 0.0001949 |
| PRCP         | prolylcarboxypeptidase (angiotensinase C)                                   | 534927    | -1.15 | 0.0017019 |
| LOC100125763 | neuronal protein 3.1                                                        | 100125763 | -1.14 | 0.0002034 |
| FAR2         | fatty acyl CoA reductase 2                                                  | 534380    | -1.14 | 0.0001104 |
| CALCRL       | calcitonin receptor-like                                                    | 527140    | -1.14 | 0.0036428 |
| TCP11L2      | t-complex 11 (mouse)-like 2                                                 | 541012    | -1.13 | 0.0004916 |
| GAMT         | guanidinoacetate N-methyltransferase                                        | 515270    | -1.13 | 0.0000427 |
| CEACAM8      | carcinoembryonic antigen-related cell adhesion molecule 8                   | 404118    | -1.12 | 0.0000702 |
| MAOA         | monoamine oxidase A                                                         | 281293    | -1.12 | 0.0000381 |
| SPP1         | secreted phosphoprotein 1                                                   | 281499    | -1.12 | 0.0004398 |
| LOC540312    | similar to Protein DDX26B                                                   | 540312    | -1.12 | 0.0005949 |
| MGC128424    | hypothetical protein MGC128424                                              | 767924    | -1.12 | 0.0002387 |
| LOC618444    | hypothetical LOC618444                                                      | 618444    | -1.11 | 0.0004423 |
| CADM4        | cell adhesion molecule 4                                                    | 523277    | -1.10 | 0.0002518 |
| NDRG2        | NDRG family member 2                                                        | 515063    | -1.10 | 0.0003372 |
| APOA1        | apolipoprotein A-I                                                          | 281631    | -1.10 | 0.0002895 |
| TSPYL4       | TSPY-like 4                                                                 | 508104    | -1.09 | 0.0001361 |
| ECHDC2       | enoyl Coenzyme A hydratase domain containing 2                              | 513795    | -1.09 | 0.0000744 |
| PPP2R2A      | protein phosphatase 2 (formerly 2A), regulatory subunit B,<br>alpha isoform | 508045    | -1.09 | 0.0000616 |
| SPOCK2       | sparc/osteonectin, cwcv and kazal-like domains proteoglycan<br>(testican) 2 | 523846    | -1.09 | 0.0013050 |
| SH3KBP1      | SH3-domain kinase binding protein 1                                         | 510489    | -1.09 | 0.0004764 |
| SLCO2A1      | solute carrier organic anion transporter family, member 2A1                 | 282468    | -1.08 | 0.0005892 |
| LOC536909    | similar to SNF related kinase                                               | 536909    | -1.08 | 0.0001141 |
| EXTL3        | exostoses (multiple)-like 3                                                 | 783970    | -1.08 | 0.0001800 |

|           |                                                                                          |        |       |           |
|-----------|------------------------------------------------------------------------------------------|--------|-------|-----------|
| ZNF503    | zinc finger protein 503                                                                  | 789846 | -1.08 | 0.0002082 |
| NETO2     | neuropilin (NRP) and tolloid (TLL)-like 2                                                | 520056 | -1.07 | 0.0001087 |
| RELL1     | RELT-like 1                                                                              | 768210 | -1.07 | 0.0001174 |
| MGC128008 | hypothetical LOC510399                                                                   | 510399 | -1.07 | 0.0002582 |
| THBD      | thrombomodulin                                                                           | 281529 | -1.07 | 0.0001610 |
| HMGA1     | high mobility group AT-hook 1                                                            | 618849 | -1.07 | 0.0003056 |
| SYTL2     | synaptotagmin-like 2                                                                     | 614406 | -1.07 | 0.0013559 |
| NFIL3     | nuclear factor, interleukin 3 regulated                                                  | 506097 | -1.06 | 0.0003372 |
| AMIGO2    | adhesion molecule with Ig-like domain 2                                                  | 514273 | -1.06 | 0.0001448 |
| LOC511229 | similar to mCG142710                                                                     | 511229 | -1.05 | 0.0006046 |
| RHOBTB1   | Rho-related BTB domain containing 1                                                      | 540513 | -1.05 | 0.0001506 |
| LOC515042 | similar to leucine-rich-domain inter-acting protein 1; LeR inter-acting protein 1; LEAP1 | 515042 | -1.05 | 0.0000571 |
| N4BP2L1   | NEDD4 binding protein 2-like 1                                                           | 616069 | -1.05 | 0.0013200 |
| CDKN1C    | cyclin-dependent kinase inhibitor 1C (p57, Kip2)                                         | 510972 | -1.04 | 0.0018083 |
| TPPP3     | tubulin polymerization-promoting protein family member 3                                 | 614988 | -1.04 | 0.0001954 |
| PPP1R3C   | protein phosphatase 1, regulatory (inhibitor) subunit 3C                                 | 539466 | -1.04 | 0.0017820 |
| SLC20A2   | solute carrier family 20 (phosphate transporter), member 2                               | 518905 | -1.04 | 0.0002953 |
| ABLIM1    | actin binding LIM protein 1                                                              | 504968 | -1.04 | 0.0000717 |
| TRIB2     | tribbles homolog 2 (Drosophila)                                                          | 352960 | -1.03 | 0.0018458 |
| IFNAR2    | interferon (alpha, beta and omega) receptor 2                                            | 282258 | -1.03 | 0.0008470 |
| OSBPL11   | oxysterol binding protein-like 11                                                        | 538576 | -1.02 | 0.0003414 |
| JAM2      | junctional adhesion molecule 2                                                           | 538846 | -1.02 | 0.0051204 |
| TNFSF10   | tumor necrosis factor (ligand) superfamily, member 10                                    | 507215 | -1.02 | 0.0005997 |
| TCEAL4    | transcription elongation factor A (SII)-like 4                                           | 513987 | -1.02 | 0.0001558 |
| CLEC14A   | C-type lectin domain family 14, member A                                                 | 509367 | -1.02 | 0.0004423 |
| COMMD1    | copper metabolism (Murr1) domain containing 1                                            | 534683 | -1.01 | 0.0001141 |
| AGFG2     | ArfGAP with FG repeats 2                                                                 | 510361 | -1.01 | 0.0006903 |
| RAMP3     | receptor (G protein-coupled) activity modifying protein 3                                | 613547 | -1.01 | 0.0001919 |
| SQLE      | squalene epoxidase                                                                       | 526535 | -1.00 | 0.0019354 |
| MIPEP     | mitochondrial intermediate peptidase                                                     | 517531 | -1.00 | 0.0001210 |
| GRAMD1A   | GRAM domain containing 1A                                                                | 507027 | -1.00 | 0.0003626 |
| BNIP3     | BCL2/adenovirus E1B 19kDa interacting protein 3                                          | 615342 | -1.00 | 0.0003564 |
| PDIA5     | protein disulfide isomerase family A, member 5                                           | 511603 | -1.00 | 0.0002353 |

\* Significantly enriched or depleted genes were identified between ECs exposed to normal WSS (2 Pa) and no flow static cultures (0 Pa) by a linear model approach employing an empirical Bayes method at 1% FDR and more than two-fold change between groups. The ratio of the  $\log_2$  fold change along with the adjusted FDR p-value are indicated.

Table S3: Differentially expressed genes between high WSS and normal WSS treated cells\*

| Symbol    | Description                                                               | GeneID | Ratio | Adjusted <i>p</i> value |
|-----------|---------------------------------------------------------------------------|--------|-------|-------------------------|
| ADAMTS1   | ADAM metalloproteinase with thrombospondin type 1 motif, 1                | 512171 | 3.87  | 0.0000108               |
| SULT1B1   | sulfotransferase family, cytosolic, 1B, member 1                          | 521920 | 3.11  | 0.0000476               |
| AQP1      | aquaporin 1 (Colton blood group)                                          | 282653 | 3.00  | 0.0000443               |
| AFF1      | AF4/FMR2 family, member 1                                                 | 781149 | 2.90  | 0.0000108               |
| PTPRR     | protein tyrosine phosphatase, receptor type, R                            | 536337 | 2.64  | 0.0000051               |
| IL1F6     | interleukin 1 family, member 6 (epsilon)                                  | 523429 | 2.17  | 0.0003745               |
| AIF1L     | allograft inflammatory factor 1-like                                      | 617493 | 2.16  | 0.0000108               |
| NPPC      | natriuretic peptide precursor C                                           | 281356 | 2.06  | 0.0000307               |
| PI3       | peptidase inhibitor 3, skin-derived (SKALP)                               | 407165 | 2.04  | 0.0003830               |
| ENPP1     | ectonucleotide pyrophosphatase/phosphodiesterase 1                        | 615535 | 1.90  | 0.0000320               |
| MALL      | mal, T-cell differentiation protein-like                                  | 512289 | 1.78  | 0.0000182               |
| PROCR     | protein C receptor, endothelial (EPCR)                                    | 282005 | 1.75  | 0.0000163               |
| MTMR11    | myotubularin related protein 11                                           | 506122 | 1.72  | 0.0000182               |
| PLAT      | plasminogen activator, tissue                                             | 281407 | 1.67  | 0.0000108               |
| SRXN1     | sulfiredoxin 1 homolog ( <i>S. cerevisiae</i> )                           | 531606 | 1.67  | 0.0000330               |
| AKAP12    | A kinase (PRKA) anchor protein 12                                         | 513774 | 1.67  | 0.0001672               |
| PTPRB     | protein tyrosine phosphatase, receptor type, B                            | 505696 | 1.54  | 0.0000283               |
| ADAMTS6   | ADAM metalloproteinase with thrombospondin type 1 motif, 6                | 540722 | 1.53  | 0.0000476               |
| SLC9A3R2  | solute carrier family 9 (sodium/hydrogen exchanger), member 3 regulator 2 | 768005 | 1.53  | 0.0000422               |
| NQO1      | NAD(P)H dehydrogenase, quinone 1                                          | 519632 | 1.51  | 0.0000296               |
| LOC511659 | similar to phospholipase C, gamma 2                                       | 511659 | 1.49  | 0.0002466               |
| ANO1      | anoctamin 1, calcium activated chloride channel                           | 532126 | 1.43  | 0.0010611               |
| HYAL2     | hyaluronoglucosaminidase 2                                                | 281838 | 1.40  | 0.0000300               |
| LOC538402 | similar to Protein FAM81A                                                 | 538402 | 1.39  | 0.0004365               |
| GFPT2     | glutamine-fructose-6-phosphate transaminase 2                             | 530101 | 1.38  | 0.0001799               |
| BHLHB2    | basic helix-loop-helix domain containing, class B, 2                      | 506945 | 1.34  | 0.0002369               |
| RCAN3     | RCAN family member 3                                                      | 506601 | 1.33  | 0.0013940               |
| LYVE1     | lymphatic vessel endothelial hyaluronan receptor 1                        | 404179 | 1.33  | 0.0017793               |
| NPHP1     | nephronophthisis 1 (juvenile)                                             | 505421 | 1.32  | 0.0000614               |

|           |                                                               |           |      |           |
|-----------|---------------------------------------------------------------|-----------|------|-----------|
|           | myeloid/lymphoid or mixed-lineage leukemia (trithorax         |           |      |           |
| MLLT11    | homolog, Drosophila); translocated to, 11                     | 539519    | 1.32 | 0.0041838 |
| MYOZ2     | myozenin 2                                                    | 540487    | 1.30 | 0.0000300 |
| TIMP3     | TIMP metalloproteinase inhibitor 3                            | 282094    | 1.30 | 0.0000633 |
| SLC39A8   | solute carrier family 39 (zinc transporter), member 8         | 508193    | 1.28 | 0.0005603 |
| LOC520939 | similar to Krueppel-like factor 2 (Lung krueppel-like factor) | 520939    | 1.26 | 0.0000640 |
| RPS6KA3   | ribosomal protein S6 kinase, 90kDa, polypeptide 3             | 511190    | 1.26 | 0.0001539 |
| PODXL     | podocalyxin-like                                              | 616366    | 1.26 | 0.0003699 |
|           | similar to cytidine monophosphate-N-acetylneuraminic acid     |           |      |           |
| LOC537017 | hydroxylase                                                   | 537017    | 1.22 | 0.0006263 |
| LOC529423 | similar to family with sequence similarity 40, member B       | 529423    | 1.21 | 0.0031118 |
| TMEM131   | transmembrane protein 131                                     | 540861    | 1.20 | 0.0001191 |
| DCK       | deoxycytidine kinase                                          | 530642    | 1.18 | 0.0001663 |
| SERPINB8  | serpin peptidase inhibitor, clade B (ovalbumin), member 8     | 513825    | 1.16 | 0.0001542 |
| HSPA12B   | heat shock 70kD protein 12B                                   | 515590    | 1.15 | 0.0001715 |
| HMCN1     | hemicentin 1                                                  | 521326    | 1.14 | 0.0085866 |
| RGS2      | regulator of G-protein signaling 2, 24kDa                     | 513055    | 1.14 | 0.0001909 |
| CLIC2     | chloride intracellular channel 2                              | 532777    | 1.13 | 0.0000556 |
| PLAUR     | plasminogen activator, urokinase receptor                     | 281983    | 1.13 | 0.0000606 |
| DPYSL5    | dihydropyrimidinase-like 5                                    | 100126171 | 1.13 | 0.0003949 |
| EID3      | EP300 interacting inhibitor of differentiation 3              | 507232    | 1.12 | 0.0007921 |
| FAM134B   | family with sequence similarity 134, member B                 | 540068    | 1.12 | 0.0001361 |
| MRAS      | muscle RAS oncogene homolog                                   | 540803    | 1.12 | 0.0000661 |
| FXYD3     | FXYD domain containing ion transport regulator 3              | 780807    | 1.10 | 0.0005319 |
| ARF4      | ADP-ribosylation factor 4                                     | 282601    | 1.10 | 0.0000333 |
| PLAU      | plasminogen activator, urokinase                              | 281408    | 1.08 | 0.0002676 |
| ZDHHC23   | zinc finger, DHHC-type containing 23                          | 512177    | 1.06 | 0.0011463 |
| LOC788353 | similar to Uncharacterized protein KIAA1522 homolog           | 788353    | 1.05 | 0.0002121 |
| KLF4      | Kruppel-like factor 4 (gut)                                   | 520842    | 1.04 | 0.0015850 |
| PLN       | phospholamban                                                 | 100125240 | 1.04 | 0.0007232 |
| PMP22     | peripheral myelin protein 22                                  | 534497    | 1.03 | 0.0002466 |
| JUP       | junction plakoglobin                                          | 445543    | 1.03 | 0.0002106 |
| ARHGEF15  | Rho guanine nucleotide exchange factor (GEF) 15               | 512021    | 1.02 | 0.0001417 |

|           |                                                                                                                       |        |       |           |
|-----------|-----------------------------------------------------------------------------------------------------------------------|--------|-------|-----------|
| LOC512304 | similar to ectonucleotide pyrophosphatase/phosphodiesterase 5<br>(putative function)                                  | 512304 | 1.02  | 0.0008623 |
| HSPA12A   | heat shock 70kDa protein 12A                                                                                          | 540050 | 1.02  | 0.0005250 |
| ORAI1     | ORAI calcium release-activated calcium modulator 1                                                                    | 517688 | 1.02  | 0.0002447 |
| SIRPA     | signal-regulatory protein alpha                                                                                       | 327666 | 1.01  | 0.0001140 |
| CLEC14A   | C-type lectin domain family 14, member A                                                                              | 509367 | 1.01  | 0.0003043 |
| INPP4B    | inositol polyphosphate-4-phosphatase, type II, 105kDa<br>dysbindin (dystrobrevin binding protein 1) domain containing | 534793 | 1.01  | 0.0028228 |
| DBNDD2    | 2                                                                                                                     | 507590 | 1.01  | 0.0009296 |
| HOPX      | HOP homeobox                                                                                                          | 281270 | 1.00  | 0.0024787 |
| CXCL5     | chemokine (C-X-C motif) ligand 5                                                                                      | 281735 | -3.03 | 0.0015045 |
| ASCL1     | achaete-scute complex homolog 1 (Drosophila)                                                                          | 540473 | -2.83 | 0.0004663 |
| TTR       | transthyretin                                                                                                         | 280948 | -2.69 | 0.0000444 |
| SCARA5    | scavenger receptor class A, member 5 (putative)                                                                       | 516087 | -2.66 | 0.0000614 |
| MGC127538 | hypothetical protein MGC127538                                                                                        | 767920 | -2.45 | 0.0000633 |
| CSF2      | colony stimulating factor 2 (granulocyte-macrophage)                                                                  | 281095 | -2.05 | 0.0000633 |
| CXCL2     | chemokine (C-X-C motif) ligand 2                                                                                      | 613667 | -2.01 | 0.0007065 |
| RSF1      | remodeling and spacing factor 1                                                                                       | 541248 | -1.98 | 0.0001638 |
| ARHGEF11  | Rho guanine nucleotide exchange factor (GEF) 11                                                                       | 511220 | -1.90 | 0.0007677 |
| PRUNE2    | prune homolog 2 (Drosophila)                                                                                          | 518308 | -1.88 | 0.0000067 |
| THBS1     | thrombospondin 1                                                                                                      | 281530 | -1.74 | 0.0005344 |
| FABP4     | fatty acid binding protein 4, adipocyte                                                                               | 281759 | -1.69 | 0.0006002 |
| SDC2      | syndecan 2                                                                                                            | 615785 | -1.68 | 0.0000614 |
| ADM       | adrenomedullin                                                                                                        | 280713 | -1.61 | 0.0001724 |
| GHR       | growth hormone receptor                                                                                               | 280805 | -1.60 | 0.0001062 |
| RPRM      | reprimin, TP53 dependent G2 arrest mediator candidate                                                                 | 614739 | -1.60 | 0.0005265 |
| BMP4      | bone morphogenetic protein 4                                                                                          | 407216 | -1.59 | 0.0000476 |
| COL6A3    | collagen, type VI, alpha 3                                                                                            | 530657 | -1.55 | 0.0032122 |
| LOC538778 | similar to dapper 1                                                                                                   | 538778 | -1.53 | 0.0001095 |
| NTRK2     | neurotrophic tyrosine kinase, receptor, type 2                                                                        | 505824 | -1.53 | 0.0001786 |
| SST       | somatostatin                                                                                                          | 280932 | -1.50 | 0.0008444 |
| CCL26     | chemokine (C-C motif) ligand 26                                                                                       | 508387 | -1.47 | 0.0004624 |
| CXCL2     | chemokine (C-X-C motif) ligand 2                                                                                      | 281212 | -1.46 | 0.0007382 |
| LOC539374 | similar to Family with sequence similarity 43, member A                                                               | 539374 | -1.42 | 0.0000243 |

|           |                                                                                                           |        |       |           |
|-----------|-----------------------------------------------------------------------------------------------------------|--------|-------|-----------|
| IL8       | interleukin 8                                                                                             | 280828 | -1.40 | 0.0003217 |
| SRPX2     | sushi-repeat-containing protein, X-linked 2                                                               | 514742 | -1.40 | 0.0014159 |
| COL12A1   | collagen, type XII, alpha 1                                                                               | 359712 | -1.39 | 0.0000508 |
| CLCA3P    | chloride channel accessory 3 (pseudogene)                                                                 | 281694 | -1.38 | 0.0001262 |
| FABP5     | fatty acid binding protein 5 (psoriasis-associated)                                                       | 281760 | -1.33 | 0.0000559 |
| PAH       | phenylalanine hydroxylase                                                                                 | 510583 | -1.30 | 0.0014388 |
| LOC783538 | similar to AT rich interactive domain 5B (MRF1-like)                                                      | 783538 | -1.28 | 0.0000680 |
| DHRS3     | dehydrogenase/reductase (SDR family) member 3                                                             | 281482 | -1.28 | 0.0001140 |
| FBXO32    | F-box protein 32                                                                                          | 513776 | -1.27 | 0.0000188 |
| MYLIP     | myosin regulatory light chain interacting protein<br>human immunodeficiency virus type I enhancer binding | 541070 | -1.26 | 0.0004078 |
| HIVEP1    | protein 1                                                                                                 | 529115 | -1.24 | 0.0000320 |
| WISP2     | WNT1 inducible signaling pathway protein 2                                                                | 534658 | -1.23 | 0.0000673 |
| RBM3      | RNA binding motif (RNP1, RRM) protein 3                                                                   | 509771 | -1.22 | 0.0019053 |
| RNF183    | ring finger protein 183                                                                                   | 539200 | -1.22 | 0.0000919 |
| THUMPD3   | THUMP domain containing 3                                                                                 | 508940 | -1.20 | 0.0000735 |
| ZRANB2    | zinc finger, RAN-binding domain containing 2                                                              | 508905 | -1.20 | 0.0001140 |
| TSC1      | tuberous sclerosis 1                                                                                      | 533440 | -1.17 | 0.0005250 |
| SEPP1     | selenoprotein P, plasma, 1                                                                                | 282066 | -1.16 | 0.0003388 |
| RND3      | Rho family GTPase 3                                                                                       | 540224 | -1.13 | 0.0000640 |
| CCRL1     | chemokine (C-C motif) receptor-like 1                                                                     | 281672 | -1.13 | 0.0038837 |
| FAT1      | FAT tumor suppressor homolog 1 (Drosophila)                                                               | 508251 | -1.12 | 0.0001525 |
| KBTBD6    | kelch repeat and BTB (POZ) domain containing 6                                                            | 538461 | -1.12 | 0.0024534 |
| TAGLN     | transgelin<br>nuclear factor of kappa light polypeptide gene enhancer in B-                               | 513463 | -1.12 | 0.0006028 |
| NFKBIZ    | cells inhibitor, zeta                                                                                     | 282713 | -1.12 | 0.0009440 |
| PDLIM4    | PDZ and LIM domain 4                                                                                      | 515410 | -1.12 | 0.0000865 |
| NRBP2     | nuclear receptor binding protein 2                                                                        | 504664 | -1.10 | 0.0002676 |
| AXL       | AXL receptor tyrosine kinase<br>similar to high-risk human papilloma viruses E6 oncoproteins              | 516598 | -1.07 | 0.0004190 |
| LOC534839 | targeted protein E6TP1 alpha; putative GAP protein alpha                                                  | 534839 | -1.06 | 0.0002676 |
| LOC781795 | similar to hCG1779312                                                                                     | 781795 | -1.06 | 0.0000640 |
| NQO2      | NAD(P)H dehydrogenase, quinone 2                                                                          | 508566 | -1.04 | 0.0003217 |

|         |                                                                                       |           |       |           |
|---------|---------------------------------------------------------------------------------------|-----------|-------|-----------|
| CITED2  | Cbp/p300-interacting transactivator, with Glu/Asp-rich carboxy-terminal domain, 2     | 521378    | -1.04 | 0.0015850 |
| RNPC3   | RNA-binding region (RNP1, RRM) containing 3                                           | 768060    | -1.03 | 0.0001542 |
| CYB561  | cytochrome b-561                                                                      | 317663    | -1.02 | 0.0025320 |
| CXCR4   | chemokine (C-X-C motif) receptor 4                                                    | 281736    | -1.02 | 0.0088926 |
| NRG1    | neuregulin 1                                                                          | 281361    | -1.01 | 0.0002328 |
| CBLB    | Cas-Br-M (murine) ecotropic retroviral transforming sequence b                        | 525906    | -1.01 | 0.0018281 |
| PDE4B   | phosphodiesterase 4B, cAMP-specific (phosphodiesterase E4 duncie homolog, Drosophila) | 100124505 | -1.00 | 0.0004658 |
| FRMD6   | FERM domain containing 6                                                              | 530910    | -1.00 | 0.0007921 |
| SLC17A9 | solute carrier family 17, member 9                                                    | 518062    | -1.00 | 0.0003699 |
| MXRA5   | matrix-remodelling associated 5                                                       | 786844    | -1.00 | 0.0019897 |

\*Significantly enriched or depleted genes were identified between ECs exposed to high WSS (10 Pa) and normal WSS (2 Pa) by a linear model approach employing an empirical Bayes method at 1% FDR and more than two-fold change between groups. The ratio of the  $\log_2$  fold change along with the adjusted FDR p-value are indicated.

Table S4. Genes regulated in opposite directions when high WSS and static control treated cells are compared to normal WSS treated cells

| Symbol    | Description                                                                        | Gene ID | Normal WSS vs. Static Control |                         | High WSS vs. Normal WSS |                         |
|-----------|------------------------------------------------------------------------------------|---------|-------------------------------|-------------------------|-------------------------|-------------------------|
|           |                                                                                    |         | Ratio                         | Adjusted <i>p</i> value | Ratio                   | Adjusted <i>p</i> value |
| FBXO32    | F-box protein 32                                                                   | 513776  | 1.45                          | 0.0000121               | -1.27                   | 0.0000188               |
| CYB561    | cytochrome b-561                                                                   | 317663  | 3.24                          | 0.0000151               | -1.38                   | 0.0001262               |
| IL8       | interleukin 8                                                                      | 280828  | 2.62                          | 0.0000251               | -1.12                   | 0.0001525               |
| FAT1      | FAT tumor suppressor homolog 1 (Drosophila)                                        | 508251  | 1.86                          | 0.0000393               | -1.04                   | 0.0003217               |
| TAGLN     | transgelin                                                                         | 513463  | 2.02                          | 0.0000556               | -1.40                   | 0.0003217               |
| AXL       | AXL receptor tyrosine kinase                                                       | 516598  | 1.59                          | 0.0000930               | -1.07                   | 0.0004190               |
| SRPX2     | sushi-repeat-containing protein, X-linked 2                                        | 514742  | 2.48                          | 0.0001307               | -1.60                   | 0.0005265               |
| CLCA3P    | chloride channel accessory 3 (pseudogene)                                          | 281694  | 1.42                          | 0.0001470               | -1.74                   | 0.0005344               |
| NQO2      | NAD(P)H dehydrogenase, quinone 2                                                   | 508566  | 1.15                          | 0.0002903               | -1.12                   | 0.0006028               |
| CXCL2     | chemokine (C-X-C motif) ligand 2                                                   | 281212  | 1.69                          | 0.0005255               | -1.46                   | 0.0007382               |
| RPRM      | reprimo, TP53 dependent G2 arrest mediator candidate                               | 614739  | 1.66                          | 0.0005622               | -1.12                   | 0.0009440               |
| THBS1     | thrombospondin 1                                                                   | 281530  | 1.09                          | 0.0006152               | -1.40                   | 0.0014159               |
| NFKBIZ    | nuclear factor of kappa light polypeptide gene enhancer in B-cells inhibitor, zeta | 282713  | 1.35                          | 0.0073629               | -1.02                   | 0.0025320               |
| PLAU      | plasminogen activator, urokinase similar to ectonucleotide                         | 281408  | -1.63                         | 0.0000571               | 1.08                    | 0.0002676               |
| LOC512304 | pyrophosphatase/phosphodiesterase 5 (putative function)                            | 512304  | -2.40                         | 0.0000215               | 1.02                    | 0.0008623               |
| CLEC14A   | C-type lectin domain family 14, member A                                           | 509367  | -1.02                         | 0.0004423               | 1.01                    | 0.0003043               |

\*Significantly enriched or depleted genes were identified by Venn Analysis between ECs exposed to high WSS (10 Pa) and normal WSS (2 Pa) compared to those genes enriched or depleted between normal WSS (2 Pa) and no flow static cultures (0 Pa). Genes overlapping between but having opposite directions of regulation are listed with their ratio of the log<sub>2</sub> fold change and adjusted FDR p-value.

Table S5. Complete list of significantly enriched or depleted gene categories between high WSS and normal WSS treated cells determined by GO-based GSEA\*

| Gene Ontology Term                            | Ratio  | Adjusted <i>p</i> value |
|-----------------------------------------------|--------|-------------------------|
| GO:0005694 chromosome                         | 9.98   | 0.011                   |
| GO:0022403 cell cycle phase                   | 9.70   | 0.012                   |
| GO:0000279 M phase                            | 9.70   | 0.012                   |
| GO:0004222 metalloendopeptidase activity      | 9.24   | 0.009                   |
| GO:0044427 chromosomal part                   | 9.18   | 0.009                   |
| GO:0000278 mitotic cell cycle                 | 8.53   | 0.012                   |
| GO:0015630 microtubule cytoskeleton           | 8.25   | 0.043                   |
| GO:0000087 M phase of mitotic cell cycle      | 8.24   | 0.011                   |
| GO:0007067 mitosis                            | 8.14   | 0.011                   |
| GO:0031404 chloride ion binding               | 7.89   | 0.011                   |
| GO:0043168 anion binding                      | 7.89   | 0.011                   |
| GO:0051301 cell division                      | 7.18   | 0.011                   |
| GO:0018958 phenol metabolic process           | 7.15   | 0.011                   |
| GO:0008237 metallopeptidase activity          | 7.11   | 0.009                   |
| GO:0000775 chromosome, centromeric region     | 6.92   | 0.019                   |
| GO:0000793 condensed chromosome               | 6.60   | 0.030                   |
| GO:0014704 intercalated disc                  | 6.50   | 0.009                   |
| GO:0005254 chloride channel activity          | 6.36   | 0.011                   |
| GO:0006066 alcohol metabolic process          | 6.18   | 0.013                   |
| GO:0005819 spindle                            | 6.09   | 0.012                   |
| GO:0001664 G-protein-coupled receptor binding | -10.86 | 0.043                   |
| GO:0006817 phosphate transport                | -8.64  | 0.013                   |
| GO:0007389 pattern specification process      | -8.23  | 0.011                   |
| GO:0001764 neuron migration                   | -8.06  | 0.025                   |
| GO:0005179 hormone activity                   | -7.84  | 0.012                   |
| GO:0007507 heart development                  | -7.58  | 0.011                   |
| GO:0002274 myeloid leukocyte activation       | -7.42  | 0.009                   |
| GO:0007420 brain development                  | -7.15  | 0.011                   |
| GO:0001655 urogenital system development      | -6.94  | 0.011                   |

|                                                       |       |       |
|-------------------------------------------------------|-------|-------|
| GO:0030900 forebrain development                      | -6.77 | 0.015 |
| GO:0001822 kidney development                         | -6.63 | 0.011 |
| GO:0002573 myeloid leukocyte differentiation          | -6.56 | 0.011 |
| GO:0031983 vesicle lumen                              | -6.48 | 0.023 |
| GO:0060205 cytoplasmic membrane-bounded vesicle lumen | -6.48 | 0.023 |
| GO:0042446 hormone biosynthetic process               | -6.46 | 0.009 |
| GO:0051046 regulation of secretion                    | -6.46 | 0.015 |
| GO:0031093 platelet alpha granule lumen               | -6.12 | 0.031 |
| GO:0006941 striated muscle contraction                | -6.05 | 0.015 |

\* Gene set enrichment analysis (GSEA) was performed using parametric GSEA to the gene ontology (GO) database. A linear model approach employing an empirical Bayes method was used to generate a moderated t-test statistic and FDR corrected p-values associated with specific gene set enrichment were calculated. GO categories were identified at a 5% FDR and more than six-  $\log_2$  fold change between high WSS and normal WSS profiles.

Table S6. Complete list of significantly enriched or depleted gene categories between high WSS and normal WSS treated cells determined by KEGG-based GSEA\*

| KEGG Pathway                                 | KEGG ID | Ratio  | Adjusted <i>p</i> value |
|----------------------------------------------|---------|--------|-------------------------|
| Cell cycle                                   | 04110   | 4.74   | 0.021                   |
| MAPK signaling pathway                       | 04010   | 4.39   | 0.021                   |
| Glutamate metabolism                         | 00251   | 4.39   | 0.034                   |
| Biosynthesis of steroids                     | 00100   | 4.26   | 0.037                   |
| Long-term potentiation                       | 04720   | 4.08   | 0.038                   |
| DNA replication                              | 03030   | 3.21   | 0.030                   |
| Nicotinate and nicotinamide metabolism       | 00760   | 2.91   | 0.030                   |
| B cell receptor signaling pathway            | 04662   | 2.88   | 0.050                   |
| Pentose phosphate pathway                    | 00030   | 2.68   | 0.041                   |
| Calcium signaling pathway                    | 04020   | 2.66   | 0.038                   |
| Phosphatidylinositol signaling system        | 04070   | 2.56   | 0.039                   |
| Pyrimidine metabolism                        | 00240   | 2.47   | 0.038                   |
| Pathogenic Escherichia coli infection - EHEC | 05130   | 2.35   | 0.041                   |
| Pathogenic Escherichia coli infection - EPEC | 05131   | 2.35   | 0.041                   |
| Ether lipid metabolism                       | 00565   | 2.26   | 0.041                   |
| Cytokine-cytokine receptor interaction       | 04060   | -11.50 | 0.037                   |
| Jak-STAT signaling pathway                   | 04630   | -6.93  | 0.023                   |
| TGF-beta signaling pathway                   | 04350   | -5.07  | 0.021                   |
| Ribosome                                     | 03010   | -3.41  | 0.034                   |
| Bladder cancer                               | 05219   | -2.94  | 0.041                   |

\*Gene set enrichment analysis (GSEA) was performed using parametric GSEA to the KEGG pathway database. A linear model approach employing an empirical Bayes method was used to generate a moderated t-test statistic and FDR corrected p-values associated with specific gene set enrichment were calculated. Categories were identified at a 5% FDR and are represented as the log<sub>2</sub> fold change between high WSS and normal WSS profiles
